# Supplementary material
Source: publisher figshare collection journal article supplement (https://acs.figshare.com/ndownloader/files/4255252)

# Determining a Synthetic Approach to Pierisformoside C

Sharon Chow, Christoph Kreß, Nanna Albæk, Carsten Jessen, Craig M. Williams\*

School of Chemistry and Molecular Biosciences, University of Queensland, Brisbane, 4072, Queensland, Australia

## Supporting Information

|                                                                    |     |
|--------------------------------------------------------------------|-----|
| Table of Contents                                                  | S1  |
| Materials and Methods                                              | S2  |
| Synthesis of Compounds <b>21 - 23, 16, 17, 28, 27, 29, 33 – 35</b> | S3  |
| <sup>1</sup> H and <sup>13</sup> C NMR spectra                     | S11 |

---

\* Author to whom correspondence should be addressed (c.williams3@mailbox.uq.edu.au).

## Materials and Methods

$^1\text{H}$  and  $^{13}\text{C}$  NMR spectra were recorded on Bruker AV300, AMX400 and/or DRX500 instruments using  $\text{CDCl}_3$  (99.8 atom % D) as solvent. Coupling constants are given in Hz and chemical shifts are expressed as  $\delta$  values in ppm. The residue solvent peaks were used as internal references ( $\delta_{\text{H}}$  7.24;  $\delta_{\text{C}}$  77.0). High resolution ESI mass spectral data were obtained on a Finnigan MAT 900XL or Bruker micrOTOF<sub>Q</sub> spectrometer. Column chromatography was undertaken on silica gel (flash silica gel 230–400 mesh), with distilled solvents. Anhydrous solvents were prepared according to Perin and Armarego, 'Purification of laboratory solvents', 3<sup>rd</sup> Ed. Fine chemicals were purchased from the Aldrich Chem. Co. Petroleum spirit constitutes the fraction boiling between 40–60°C. Melting points were measured on a Buchi Dr Tottoli apparatus and are uncorrected.

### 3-Hydroxy-2,2-dimethylcyclopentyl benzoate **21**

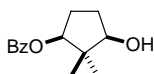

To 2,2-dimethyl-1,3-cyclopentadione **13** (0.50 g, 4.0 mmol) in tetrahydrofuran (10 mL) was added NaBH<sub>4</sub> (0.18 g, 4.8 mmol) in water (1.5 mL). After stirring for 2.5 h water (2.5 mL) was added and the solution was acidified to pH ~2 with hydrochloric acid (2 M solution). The mixture was extracted with Et<sub>2</sub>O (3 × 50 mL). The combined organic phases were washed with brine (10 mL), dried (MgSO<sub>4</sub>), and evaporated. 2,2-Dimethyl-1,3-cyclopentadiol was purified by column chromatography (EtOAc/petroleum spirit, 3:7), with the *cis*-isomer eluting first and then the *trans*-isomer in a 1:1 ratio. Both diols were obtained as a white solid (0.47 g, 90%). *cis*-diol: <sup>1</sup>H NMR (400 MHz, DMSO) δ 0.65 (s, 3H), 0.85 (s, 3H), 1.37-1.41 (m, 2H), 1.69-1.73 (m, 2H), 3.38-3.45 (m, 2H), 4.38 (d, *J* 4.1, 2H). <sup>13</sup>C NMR (100 MHz, DMSO) δ 13.3, 24.3, 28.4, 43.4, 76.5. M.p. 128-130°C. *trans*-diol: <sup>1</sup>H NMR (400 MHz, DMSO) δ 0.78 (s, 6H), 1.26-1.38 (m, 2H), 1.85-1.98 (m, 2H), 3.59-3.64 (m, 2H), 4.31 (bd, 2H). <sup>13</sup>C NMR (100 MHz, DMSO) δ 20.3, 29.7, 44.8, 77.5. M.p. 88-89°C.

*Cis*-2,2-dimethylcyclopentane-1,3-diol<sup>1</sup> (0.10 g, 0.77 mmol) was dissolved in dry anhydrous pyridine (2 mL) and stirred under an argon atmosphere. Benzoyl chloride (89 μL, 0.77 mmol) was added dropwise. After 3 h of stirring at room temperature the reaction mixture was diluted with water (10 mL), followed by extraction with dichloromethane (3 × 5 mL). The combined organic phases were dried (MgSO<sub>4</sub>) and evaporated. The residue was purified by column chromatography (EtOAc /petroleum spirit 1:3) to afford the desired alcohol **21** (0.12 g, 64%) as a colorless oil. <sup>1</sup>H NMR (400 MHz, CDCl<sub>3</sub>) δ 1.02 (s, 3H), 1.09 (s, 3H), 1.75-1.91 (m, 2H), 2.09-2.28 (m, 2H), 3.80 (dd, *J* 6.7, 5.0, 1H), 5.02 (dd, *J* 6.9, 4.6, 1H), 7.42 (m, 2H), 7.53 (m, 1H), 8.01 (m, 2H). <sup>13</sup>C NMR (100 MHz, CDCl<sub>3</sub>) δ 16.0, 25.1, 28.1, 30.8, 45.7, 79.7, 82.0, 128.4 (2C), 129.5 (2C), 130.1, 132.9, 171.1. HRESIMS *m/z* 257.1148 (calcd for C<sub>14</sub>H<sub>18</sub>O<sub>3</sub>Na, 257.1154).

### 2,2-Dimethyl-3-oxocyclopentyl benzoate **22**

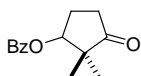

<sup>1</sup> Herein we report the mono-protection of the *cis*-diol **13**. On other occasions, a mixture of the *cis*- and *trans*-diols **13** was protected and then oxidised directly, under the same conditions, to give the same benzoate **22**.

3-Hydroxy-2,2-dimethylcyclopentyl benzoate **21** (0.12 g, 0.49 mmol) was dissolved in anhydrous dichloromethane (2 mL) under an argon atmosphere and a few pre-dried 4Å molecular sieves was added. *N*-Methyl morpholine *N*-oxide (0.097 g, 0.83 mmol) and tetrapropylammonium perruthenate (TPAP, 7.4 mg, 4 mol%) were then added. The mixture was stirred for 80 min and then eluted (EtOAc) through silica. The residue was purified by column chromatography (EtOAc /petroleum spirit 1:4) affording the title ketone **22** (0.11 g, 95%) as a colorless oil. <sup>1</sup>H NMR (400 MHz, CDCl<sub>3</sub>) δ 1.10 (s, 3H), 1.11 (s, 3H), 2.07-2.12 (m, 1H), 2.34-2.51 (m, 3H), 5.34 (m, 1H), 7.41 (m, 2H), 7.53 (m, 1H), 7.97 (m, 2H). <sup>13</sup>C NMR (100 MHz, CDCl<sub>3</sub>) δ 17.7, 22.5, 25.4, 34.0, 49.3, 80.2, 128.4 (2C), 129.5 (2C), 129.9, 133.1, 165.7, 219.5. HRESIMS *m/z* 255.0992 (calcd for C<sub>14</sub>H<sub>16</sub>O<sub>3</sub>Na, 255.0997).

#### 4-(Ethoxycarbonyl)-2,2-dimethyl-3-(trifluoromethylsulfonyloxy)cyclopent-3-enyl benzoate **23**

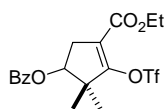

*Mander's reaction.* 2,2-Dimethyl-3-oxocyclopentyl benzoate **22** (0.10 g, 0.43 mmol) was dissolved in anhydrous THF (2 mL) under an argon atmosphere. To this was added hexamethylphosphoramide (HMPA, 0.12 mL, 0.69 mmol) followed by cooling to -78 °C. Diisopropylamine (0.072 mL, 0.51 mmol) was added to THF (1 mL) under an argon atmosphere. Upon cooling to 0 °C, <sup>n</sup>BuLi solution (1.3 M in THF, 0.36 mL) was added and the solution was stirred for 10 min before addition to the above solution. After 1 h of stirring, ethyl cyanofomate (0.047 mL, 0.47 mmol) was added and the reaction was allowed to warm to room temperature over 18 h. The reaction was quenched with saturated NH<sub>4</sub>Cl solution. The mixture was diluted with water (10 mL) and extracted with Et<sub>2</sub>O (3 × 5 mL). The combined organic phases were dried (MgSO<sub>4</sub>), concentrated and the residue was purified by column chromatography (Et<sub>2</sub>O/petroleum spirit 1:1) to afford a diastereomeric mixture of 4-(ethoxycarbonyl)-2,2-dimethyl-3-oxocyclopentyl benzoate (95 mg, 73%) as a pale yellow oil, which was used in the next reaction directly.

*Triflate formation.* 4-(Ethoxycarbonyl)-2,2-dimethyl-3-oxocyclopentyl benzoate (95 mg, 0.31 mmol) was dissolved in THF (2 mL) and cooled to -78 °C. Diisopropylamine (0.052 mL, 0.37 mmol) was added to THF (1 mL) under an argon atmosphere and cooled to 0 °C, <sup>n</sup>BuLi solution (1.3 M in THF, 0.26 mL) was added and the mixture was stirred at 0 °C for 10 min before adding to the above solution. After 1 h of stirring, trifluoromethanesulfonic anhydride (0.11 mL, 0.63 mmol) was added and the reaction was stirred at -78 °C for 3h. The reaction was quenched with saturated NH<sub>4</sub>Cl solution, then diluted with water (10 mL) and extracted with Et<sub>2</sub>O (3 × 5 mL). The

combined organic phases were dried (MgSO<sub>4</sub>), concentrated and the residue was purified by column chromatography (EtOAc/petroleum spirit 1:1) to give triflate **23** (0.13 g, 92%) as a pale yellow oil. <sup>1</sup>H NMR (400 MHz, CDCl<sub>3</sub>) δ 1.24 (s, 3H), 1.29 (s, 3H), 1.31 (t, *J* 7.2, 3H), 2.75 (dd, *J* 16.9, 3.8, 1H), 3.23 (dd, *J* 17.0, 6.9, 1H), 4.28 (q, *J* 7.4, 2H), 5.26 (dd, *J* 6.7, 3.8, 1H), 7.44 (m, 2H), 7.58 (m, 1H), 8.02 (m, 2H). <sup>13</sup>C NMR (100 MHz, CDCl<sub>3</sub>) δ 14.0, 18.1, 23.4, 34.3, 48.6, 61.5, 76.9, 118.5 (q, *J*<sub>C-F</sub> 320.4), 118.7, 128.5 (2C), 129.5, 129.6 (2C), 133.4, 156.3, 162.1, 165.8. HRESIMS *m/z* 459.0696 (calcd for C<sub>18</sub>H<sub>19</sub>F<sub>3</sub>O<sub>7</sub>SN<sub>a</sub>, 459.0701).

### Methyl 1-(2-bromoallyl)-5-oxocyclohex-3-enecarboxylate **16**

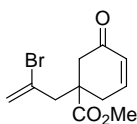

**Birch reduction.** Following the combined methods of Marinovic and Smith,<sup>2</sup> to liquid ammonia (180 mL) at –78 °C was added a solution of 3-methoxybenzoic acid **15** (5.41 g, 35.5 mmol) in anhydrous THF (35 mL) followed by lithium metal (0.74 g, 0.11 mmol) until the blue colour persisted. The blue solution was stirred for 1 h before rapid dropwise addition of 2,3-dibromopropene (5.14 mL, 49.8 mmol). After a further 1 h at –78 °C solid ammonium chloride (9.50 g, 178 mmol) was added and the ammonia was allowed to evaporate overnight. Hydrochloric acid (3 N, 180 mL) was added to the residue and refluxed for 20 min. On cooling the reaction mixture was extracted with Et<sub>2</sub>O (3 × 60 mL). The combined organic layers were extracted with NaHCO<sub>3</sub> solution (10%, 2 × 90 mL). The aqueous phase was acidified with conc. hydrochloric acid to pH 2 and then reextracted with Et<sub>2</sub>O (5 × 60 mL) and dried (MgSO<sub>4</sub>). Upon solvent evaporation, 1-(2-bromoprop-2-en-1-yl)-5-oxocyclohex-3-ene-1-carboxylic acid (6.9 g, 76%) was obtained and used in the next step without further purification.

**Esterification.** 1-(2-Bromoallyl)-5-oxocyclohex-3-enecarboxylic acid (6.5 g, 25 mmol) was suspended in Et<sub>2</sub>O (200 mL) and diazomethane in Et<sub>2</sub>O was added in portions at 5 °C, until all solid was dissolved. The reaction was allowed to warm to room temperature. After 2 h the ethereal solution was washed with saturated NaHCO<sub>3</sub> solution (75 mL), dried (NaSO<sub>4</sub>), filtrated and concentrated under vacuo. The residue was subjected to column chromatography (EtOAc/petroleum spirit, 1:1), to give compound **18** (6.2 g, 90%) as a pale yellow oil. <sup>1</sup>H NMR (400 MHz, CDCl<sub>3</sub>) δ 2.47 (d, *J* 16.5, 1H), 2.49 (ddd, *J* 18.4, 3.4, 2.8, 1H), 2.82 (d, *J* 14.6, 1H), 2.89 (ddd, *J* 18.5, 5.2, 1.6, 1H), 2.90 (d, *J* 14.6, 1H), 2.94 (dd, *J* 16.4, 1.4, 1H), 3.67 (s, 3H), 5.56 (s, 2H), 6.02 (m, 1H), 6.85

<sup>2</sup> a) Marinovic, N.N.; Ramanathan, H. *Tetrahedron Lett.*, **1983**, 24, 1871; b) Smith, A.B., III; Richmond, R.E. *J. Am. Chem. Soc.* **1983**, 105, 575.

(ddd,  $J$  10.1, 5.0, 3.4, 1H).  $^{13}\text{C}$  NMR (100 MHz,  $\text{CDCl}_3$ )  $\delta$  33.9, 44.8, 48.3, 48.5, 52.6, 121.9, 126.6, 129.8, 146.7, 174.2, 196.3.

### Methyl 6-methylene-3-oxobicyclo[3.2.1]octane-1-carboxylate **17**

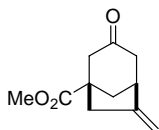

Following the method of Marinovic,<sup>3</sup> methyl 1-(2-bromoallyl)-5-oxocyclohex-3-enecarboxylate **16** (0.10 g, 0.36 mmol), tributyltinhydride (freshly distilled, 0.10 mL, 0.39 mmol) and recrystallised VAZO-64<sup>®</sup> (AIBN, 3 mg, 0.02 mmol) were dissolved in anhydrous toluene (2 mL) under an argon atmosphere. The solution was refluxed for 3 h. On cooling the solvent was evaporated and the oily residue was filtered through a pad of potassium fluoride/silica gel (containing 10%  $\text{K}_2\text{CO}_3$ ) with dichloromethane. The residue was further purified by column chromatography (EtOAc/petroleum spirit, 1:3) to give the desired bicycle **17** (58 mg, 83%) as a colourless oil containing a trace of inseparable [3.3.1]-bicycle.  $^1\text{H}$  NMR (500MHz,  $\text{CDCl}_3$ )  $\delta$  1.99 (dd,  $J$  11.9, 2.5, 1H), 2.27 (dp,  $J$  11.9, 2.7, 1H), 2.37-2.50 (m, 3H), 2.59 (dt,  $J$  16.8, 2.5, 1H), 2.69 (dd,  $J$  16.8, 2.8, 1H), 2.81 (dt,  $J$  17.2, 2.8, 1H), 3.03 (m, 1H), 3.69 (s, 3H), 4.91 (bs, 1H), 4.99 (bt, 1H).  $^{13}\text{C}$  NMR (125MHz,  $\text{CDCl}_3$ )  $\delta$  40.8, 41.3, 41.8, 49.7, 50.3, 50.6, 52.2, 108.9, 150.4, 174.9, 208.3.

### 6-Methylene-3-oxobicyclo[3.2.1]octane-1-carbaldehyde **28**

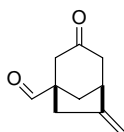

**Reduction.** Methyl 6-methylene-3-oxobicyclo[3.2.1]octane-1-carboxylate **17** (2.00 g, 10.3 mmol) was dissolved in anhydrous THF (100 mL) under an argon atmosphere. Lithium aluminium hydride ( $\text{LiAlH}_4$ , 1.17 g, 30.9 mmol) was added portion wise at 0 °C, and the suspension was stirred at room temperature for 4 h. The reaction was quenched with  $\text{Na}_2\text{SO}_4 \cdot 10\text{H}_2\text{O}$  and the mixture was stirred for 30 min. The white solid was filtered off and rinsed with dichloromethane. The combined organic phases were dried ( $\text{MgSO}_4$ ) and concentrated under vacuo. After flash chromatography ( $\text{Et}_2\text{O}$ ), 1-(hydroxymethyl)-6-methylenebicyclo[3.2.1]octan-3-ol (1.3 g, 75%) was obtained as two column separable diastereomers, both in the form of a colourless oil. *First eluted diol*:  $^1\text{H}$  NMR (400 MHz,

<sup>3</sup> Marinovic, N.N.; Ramanathan, H. *Tetrahedron Lett.*, **1983**, 24, 1871.

CDCl<sub>3</sub>)  $\delta$  1.28 (dd, *J* 10.9, 2.7, 1H), 1.35 (t, *J* 6.0, 1H), 1.63 (m, 1H), 1.80 (ddd, *J* 14.1, 4.7, 1.7, 1H), 1.86 (m, 1H), 1.94 (dt, *J* 3.5, 1.0, 1H), 2.19 (d, *J* 7.5, 1H), 2.23 (ddd, *J* 16.6, 4.7, 2.5, 1H), 2.61 (m, 1H), 2.76 (m, 1H), 3.51 (dd, *J* 5.6, 2.1, 2H), 4.08 (m, 1H), 4.92 (m, 1H), 5.08 (m, 1H). <sup>13</sup>C NMR (100 MHz, CDCl<sub>3</sub>)  $\delta$  39.5, 40.7, 41.5, 41.6, 43.0, 44.6, 67.1, 70.6, 106.7, 155.9. *Second eluted diol*: <sup>1</sup>H NMR (400 MHz, CDCl<sub>3</sub>)  $\delta$  1.29-1.42 (m, 5H), 1.54 (m, 1H), 1.95 (ddt, *J* 12.0, 6.0, 2.0, 1H), 2.03 (dddt, *J* 11.9, 6.2, 4.6, 1.8, 1H), 2.16 (m, 1H), 2.74 (bt, *J* 5.3, 1H), 3.50 (d, *J* 5.8, 2H), 3.96 (m, 1H), 4.77 (m, 1H), 4.88 (tt, *J* 2.6, 1.0, 1H). <sup>13</sup>C NMR (100 MHz, CDCl<sub>3</sub>)  $\delta$  39.4, 40.7, 42.5, 43.26, 43.31, 46.0, 66.4, 70.1, 105.1, 153.9. HRESIMS *m/z* 191.1043 (calcd for C<sub>10</sub>H<sub>16</sub>O<sub>2</sub>Na, 191.1048).

*Oxidation*. 1-(Hydroxymethyl)-6-methylidenebicyclo[3.2.1]octan-3-ol (0.26 g, 1.6 mmol) was dissolved in anhydrous dichloromethane (100 mL) under an argon atmosphere and a few pre-dried 4Å molecular sieves were added. *N*-Methyl morpholine *N*-oxide (0.40 g, 3.4 mmol) and tetrapropylammonium perruthenate (52 mg, 0.15 mmol) were added. The mixture was stirred at room temperature for 3 h and then eluted with EtOAc through a plug of silica. The solvent was evaporated and residue was purified by column chromatography (Et<sub>2</sub>O/petroleum spirit 1:8) to afford the title aldehyde **28** (0.86 g, 68%) as a colorless oil. <sup>1</sup>H NMR (400 MHz, CDCl<sub>3</sub>)  $\delta$  1.83 (dd, *J* 11.7, 2.7, 1H), 2.19 (dddd, *J* 11.7, 5.4, 2.9, 2.1, 1H), 2.32 (m, 1H), 2.46 (m, 2H), 2.53 (dd, *J* 16.6, 3.8, 1H), 2.68 (dd, *J* 16.6, 2.9, 1H), 2.76 (dq, *J* 16.9, 2.9, 1H), 3.12 (m, 1H), 5.00 (m, 1H), 5.09 (ddd, *J* 3.0, 2.1, 0.9, 1H), 9.56 (s, 1H). <sup>13</sup>C NMR (100 MHz, CDCl<sub>3</sub>)  $\delta$  38.65, 38.69, 41.9, 46.9, 50.9, 55.2, 109.7, 149.9, 201.4, 208.1. HRESIMS *m/z* 219.0992 (calcd for C<sub>10</sub>H<sub>12</sub>O<sub>2</sub>Na+CH<sub>3</sub>OH, 219.0997).

### 1-Ethynyl-6-methylenebicyclo[3.2.1]octan-3-one **27**

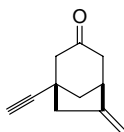

6-Methylene-3-oxobicyclo[3.2.1]octane-1-carbaldehyde **28** (0.10 g, 0.58 mmol) was dissolved in anhydrous 1% dichloromethane in methanol (2 mL). To this solution was added diethyl (1-diazo-2-oxopropyl)phosphonate **20** (0.25 g, 1.1 mmol) and potassium carbonate (0.25 g, 1.8 mmol). The mixture was stirred at room temperature for 2 h. The solid was filtered off, washed with Et<sub>2</sub>O and solvent was then evaporated. The residue was purified by column chromatography (Et<sub>2</sub>O/petroleum spirit 1:9) affording the title acetylene **27** (69 mg, 71%) as a colourless oil. <sup>1</sup>H NMR (400 MHz, CDCl<sub>3</sub>)  $\delta$  2.07 (dd, *J* 11.9, 2.4, 1H), 2.21 (m, 1H), 2.22 (s, 1H), 2.37 (dddd, *J*

15.9, 3.5, 2.0, 1.2, 1H), 2.47 (dd, *J* 16.2, 3.7, 1H), 2.54 (m, 1H), 2.60 (m, 2H), 2.66 (ddd, *J* 17.2, 5.3, 2.7, 1H), 2.99 (m, 1H), 4.91 (bs, 1H), 4.97 (m, 1H). <sup>13</sup>C NMR (100 MHz, CDCl<sub>3</sub>) δ 37.7, 41.5, 44.0, 44.9, 50.5, 53.7, 69.7, 87.1,<sup>4</sup> 109.0, 150.5, 207.9. HRESIMS *m/z* 183.0780 (calcd for C<sub>11</sub>H<sub>12</sub>ONa, 183.0786).

## Acetylene **29**

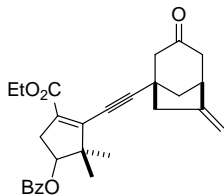

Following the method of Jacobi,<sup>5</sup> to a dry flask was placed CuI (5 mg, 10 μmol) and tetrakis(triphenylphosphine)palladium(0) (15 mg, 13 μmol) under an argon atmosphere. Compound **23** (110 mg, 0.25 mmol) in anhydrous THF (1 mL) and anhydrous triethylamine (0.10 mL, 0.75 mmol) was added to the above mixture. After 10 min, 1-ethynyl-6-methylidenebicyclo[3.2.1]octan-3-one **27** (56 mg, 0.35 mmol) in anhydrous THF (0.5 mL) was added, and the solution darkened after stirring for a minute. The reaction was stirred for 5 h at room temperature, followed by diluting with brine and extracted with Et<sub>2</sub>O (3 × 5 mL). The combined organic layers were washed with saturated NH<sub>4</sub>Cl solution, dried (MgSO<sub>4</sub>) and concentrated under vacuo. The residue was purified by column chromatography (EtOAc/petroleum spirit 1:3) affording the title product **29** (81 mg, 72%) as a yellow oil. <sup>1</sup>H NMR (400 MHz, CDCl<sub>3</sub>) δ 1.19 (s, 3H), 1.20 (s, 3H), 1.30 (t, *J* 7.1, 3H), 2.15 (dd, *J* 11.9, 2.4, 1H), 2.30 (dt, *J* 11.9, 5.1, 2.1, 1H), 2.41 (m, 1H), 2.50 (dd, *J* 16.0, 3.6, 1H), 2.60-2.77 (m, 5H), 3.03 (m, 1H), 3.20 (dd, *J* 18.1, 6.6, 1H), 4.21 (q, *J* 7.1, 2H), 4.93 (bs, 1H), 5.00 (bt, *J* 2.2, 1H), 5.24 (dd, *J* 6.7, 4.0, 1H), 7.41 (m, 2H), 7.54 (m, 1H), 8.01 (m, 2H). <sup>13</sup>C NMR (100 MHz, CDCl<sub>3</sub>) δ 14.4, 20.0, 25.2, 37.4, 39.0, 41.6, 44.0, 45.0, 50.6, 52.1, 53.5, 60.6, 76.4, 79.4, 105.1, 109.1, 128.4 (2C), 129.6 (2C), 130.1, 132.5, 133.1, 141.3, 150.4, 164.1, 166.1, 207.7. HRESIMS *m/z* 469.1991 (calcd for C<sub>28</sub>H<sub>30</sub>O<sub>5</sub>Na, 469.1991).

<sup>4</sup> This <sup>13</sup>C NMR data was extracted from 2D NMR HMBC experiment.

<sup>5</sup> Jacobi, P. A.; DeSimone, R. W.; Ghosh, I.; Guo, J.; Leung, S. H.; Pippin, D. *J. Org. Chem.*, **2000**, 65, 8478.



## Epoxide **33**

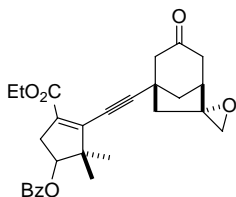

mCPBA (77%, 4.0 mg, 16  $\mu$ mol) and  $\text{NaHCO}_3$  (10 mg, 100  $\mu$ mol) were added respectively to the acetylene **29** (5.7 mg, 13  $\mu$ mol) in dichloromethane (0.3 mL) at 0°C. The suspension was stirred at the same temperature for 1 h, and then slowly warmed to room temperature. After another 4.5 h of stirring, the reaction was poured into a  $\text{Na}_2\text{SO}_3$  solution (10%) and extracted with dichloromethane ( $3 \times 2$  mL). The combined organic extracts were washed with saturated  $\text{NaHCO}_3$  solution and brine. Upon solvent evaporation, the residue was purified by flash chromatography (EtOAc/petroleum spirit 1:3) to give 3 fractions, with the first being the recovered starting material **29** (1.2 mg, 21%), followed by the major epoxide **33** (2.3 mg, 39%) and the last as a mixture of the major and minor epoxides (1.0 mg, major : minor  $\approx$  2:3, 17%).  $^1\text{H}$  NMR (MHz,  $\text{CDCl}_3$ )  $\delta$  1.20 (d,  $J$  0.7, 3H), 1.21 (d,  $J$  1.0, 3H), 1.30 (t,  $J$  7.2, 3H), 2.17 (m, 1H), 2.19 (dd,  $J$  12.0, 1.6, 1H), 2.25 (dd,  $J$  15.0, 1.5, 1H), 2.31 (dd,  $J$  14.9, 1.7, 1H), 2.43 (m, 1H), 2.49 (dd,  $J$  16.6, 4.1, 1H), 2.59 (m, 1H), 2.74 (m, 3H), 2.79 (d,  $J$  4.4, 1H), 2.85 (d,  $J$  4.4, 1H), 3.21 (dd,  $J$  18.2, 6.6, 1H), 4.22 (q,  $J$  7.2, 2H), 5.27 (dd,  $J$  6.7, 3.8, 1H), 7.43 (m, 2H), 7.55 (m, 1H), 8.01 (m, 2H).  $^{13}\text{C}$  NMR (100 MHz,  $\text{CDCl}_3$ )  $\delta$  14.4, 20.0, 25.2, 37.4, 39.5, 41.8, 42.8, 44.2, 46.1, 50.1, 52.1, 54.3, 60.6, 65.5, 76.5, 79.4, 104.2, 128.4 (2C), 129.6 (2C), 130.1, 132.9, 133.1, 141.0, 164.1, 166.1, 206.9. HRESIMS  $m/z$  485.1935 (calcd for  $\text{C}_{28}\text{H}_{30}\text{O}_6\text{Na}$ , 485.1940).

## **34** and **35**

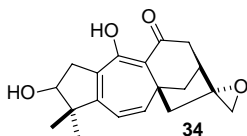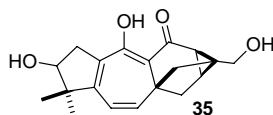

To a flask with epoxide **33** (diastereomeric at the benzoate centre, 2.2 mg, 4.8  $\mu$ mol) and Lindlar catalyst (5% Pd loading, 1 mg) in THF (1.2 mL) was charged with hydrogen. The suspension was stirred at room temperature for 1 h. The reaction was filtered through a pad of celite. After drying thoroughly under vacuum, anhydrous THF (2 mL) was added to the crude *cis*-alkene under an argon

atmosphere. NaOMe in methanol (2 M, 10  $\mu$ L) was then added dropwise. A pale yellow colour resulted from the addition and the colour slowly intensified over time. The reaction was allowed to stir for 10 h, and then poured into saturated NaHCO<sub>3</sub> solution. The aqueous phase was separated and re-extracted with EtOAc (3  $\times$  2 mL). The combined organic layers were washed with brine, dried and concentrated under vacuo. Partial separation of the diastereomers of **34** was achievable by column chromatography (EtOAc/petroleum spirit 1:3). The first and last fractions were mostly a single diastereomer and the middle as a mixture of both (0.7 mg in total, 47%). The doubly cyclised material **35** (0.3 mg, 20%) was eluted last from the column. *First eluted diastereomer of 34*: <sup>1</sup>H NMR (500 MHz, CDCl<sub>3</sub>)  $\delta$  1.04 (s, 3H), 1.06 (s, 3H), 1.50 (d, *J* 6.7, 1H), 1.76 (d, *J* 13.6, 1H), 1.97 (dd, *J* 11.7, 2.6, 1H), 2.05 (dt, *J* 5.8, 1.6, 1H), 2.25 (ddd, *J* 11.7, 6.1, 2.6, 1H), 2.41 (dt, *J* 19.2, 2.2, 1H), 2.46 (dd, *J* 13.5, 2.5, 1H), 2.68 (ddt, *J* 16.6, 7.7, 1.1, 1H), 2.72 (dd, *J* 19.2, 5.5, 1H), 2.81 (d, *J* 4.6, 1H), 2.83 (d, *J* 4.6, 1H), 2.89 (dd, *J* 16.6, 7.1, 1H), 3.97 (q, *J* 7.2, 1H), 5.83 (d, *J* 11.2, 1H), 5.91 (dd, *J* 11.2, 1.7, 1H), 16.67 (s, 1H). <sup>13</sup>C NMR (100 MHz, CDCl<sub>3</sub>)  $\delta$  18.5, 24.9, 38.0, 38.7, 42.4, 44.6, 45.3, 45.5, 49.8, 51.0, 66.8, 78.5, 118.2, 123.6, 132.1, 140.2, 155.5, 174.7, 194.6. HRESIMS *m/z* 337.1410 (calcd for C<sub>19</sub>H<sub>22</sub>O<sub>4</sub>Na, 337.1416). *Second eluted diastereomer of 34*: <sup>1</sup>H NMR (500 MHz, CDCl<sub>3</sub>)  $\delta$  1.07 (s, 6H), 1.41 (d, *J* 5.3, 1H), 1.77 (d, *J* 13.5, 1H), 1.97 (dd, *J* 11.7, 2.6, 1H), 2.05 (m, 1H), 2.26 (ddd, *J* 11.5, 6.0, 2.6, 1H), 2.41 (dt, *J* 19.1, 2.2, 1H), 2.51 (dd, *J* 17.5, 2.7, 1H), 2.52 (d, *J* 13.6, 2.8, 1H), 2.72 (dd, *J* 19.1, 5.5, 1H), 2.83 (s, 2H), 3.19 (m, 1H), 3.97 (dt, *J* 5.4, 2.7, 1H), 5.84 (d, *J* 11.0, 1H), 5.93 (dd, *J* 11.2, 1.4, 1H), 16.62 (s, 1H). <sup>13</sup>C NMR (100 MHz, CDCl<sub>3</sub>)  $\delta$  19.4, 24.5, 38.0, 39.8, 42.4, 44.6, 45.2, 45.6, 51.0, 51.5, 66.8, 77.8, 118.3, 123.4, 132.8, 139.9, 155.1, 175.0, 194.5. **35**: <sup>1</sup>H NMR (500 MHz, CDCl<sub>3</sub>)  $\delta$  1.02 (s, 6H), 1.40 (bs, 1H), 1.44 (bs, 1H), 1.69 (dd, *J* 7.7, 2.8, 1H), 1.76 (d, *J* 12.3, 1H), 1.78 (dd, *J* 12.1, 2.7, 1H), 1.88 (m, 2H), 1.99 (d, *J* 7.8, 1H), 2.50 (dd, *J* 17.4, 5.2, 1H), 2.98 (ddd, *J* 17.5, 6.5, 5.0, 1H), 3.75 (d, *J* 12.2, 1H), 3.80 (d, *J* 12.2, 1H), 3.86 (m, 1H), 5.45 (d, *J* 12.2, 1H), 5.52 (d, *J* 12.2, 1H), 17.1 (s, 1H). <sup>13</sup>C NMR (125 MHz, CDCl<sub>3</sub>)  $\delta$  18.8, 20.7, 24.5, 31.0 (2C), 38.5, 43.6, 44.7, 45.5, 50.8, 63.7, 77.2, 111.1, 118.9, 130.6, 141.2, 151.9, 169.9, 195.8.<sup>6</sup> HRESIMS *m/z* 337.1410 (calcd for C<sub>19</sub>H<sub>22</sub>O<sub>4</sub>Na, 337.1416).

<sup>6</sup> This <sup>13</sup>C NMR data was extracted from 2D NMR HMBC experiment.

CKR-5

400 MHz, CDCl<sub>3</sub>

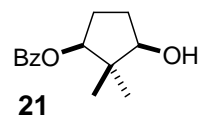

```

NAME      OL_400CKR_5
EXPNO     1
PROCNO    1
Date_     20100810
Time      10.10
INSTRUM   spect
PROBHD    5 mm Multinucl
PULPROG   zg45
TD        32768
SOLVENT   CDCl3
NS        32
DS        0
SWH       4807.692 Hz
FIDRES    0.146719 Hz
AQ        3.4080260 sec
RG        57
DW        104.000 usec
DE        12.00 usec
TE        298.0 K
D1        2.00000000 sec
TD0       1
  
```

```

===== CHANNEL f1 =====
NUC1      1H
P1        11.90 usec
PL1       0.00 dB
SFO1     400.1320007 MHz
SI        16384
SF        400.1300169 MHz
WDW       no
SSB       0
LB        0.00 Hz
GB        0
PC        1.00
  
```

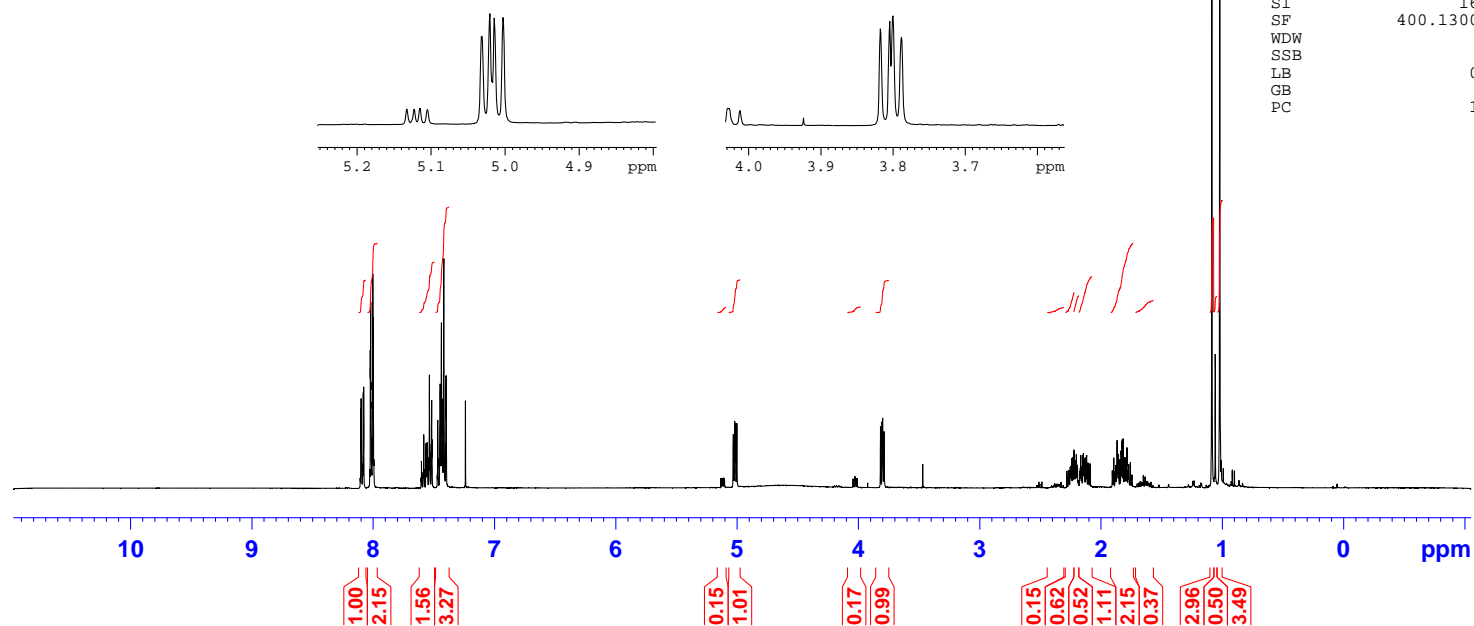

100 MHz, CDCl<sub>3</sub>

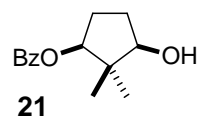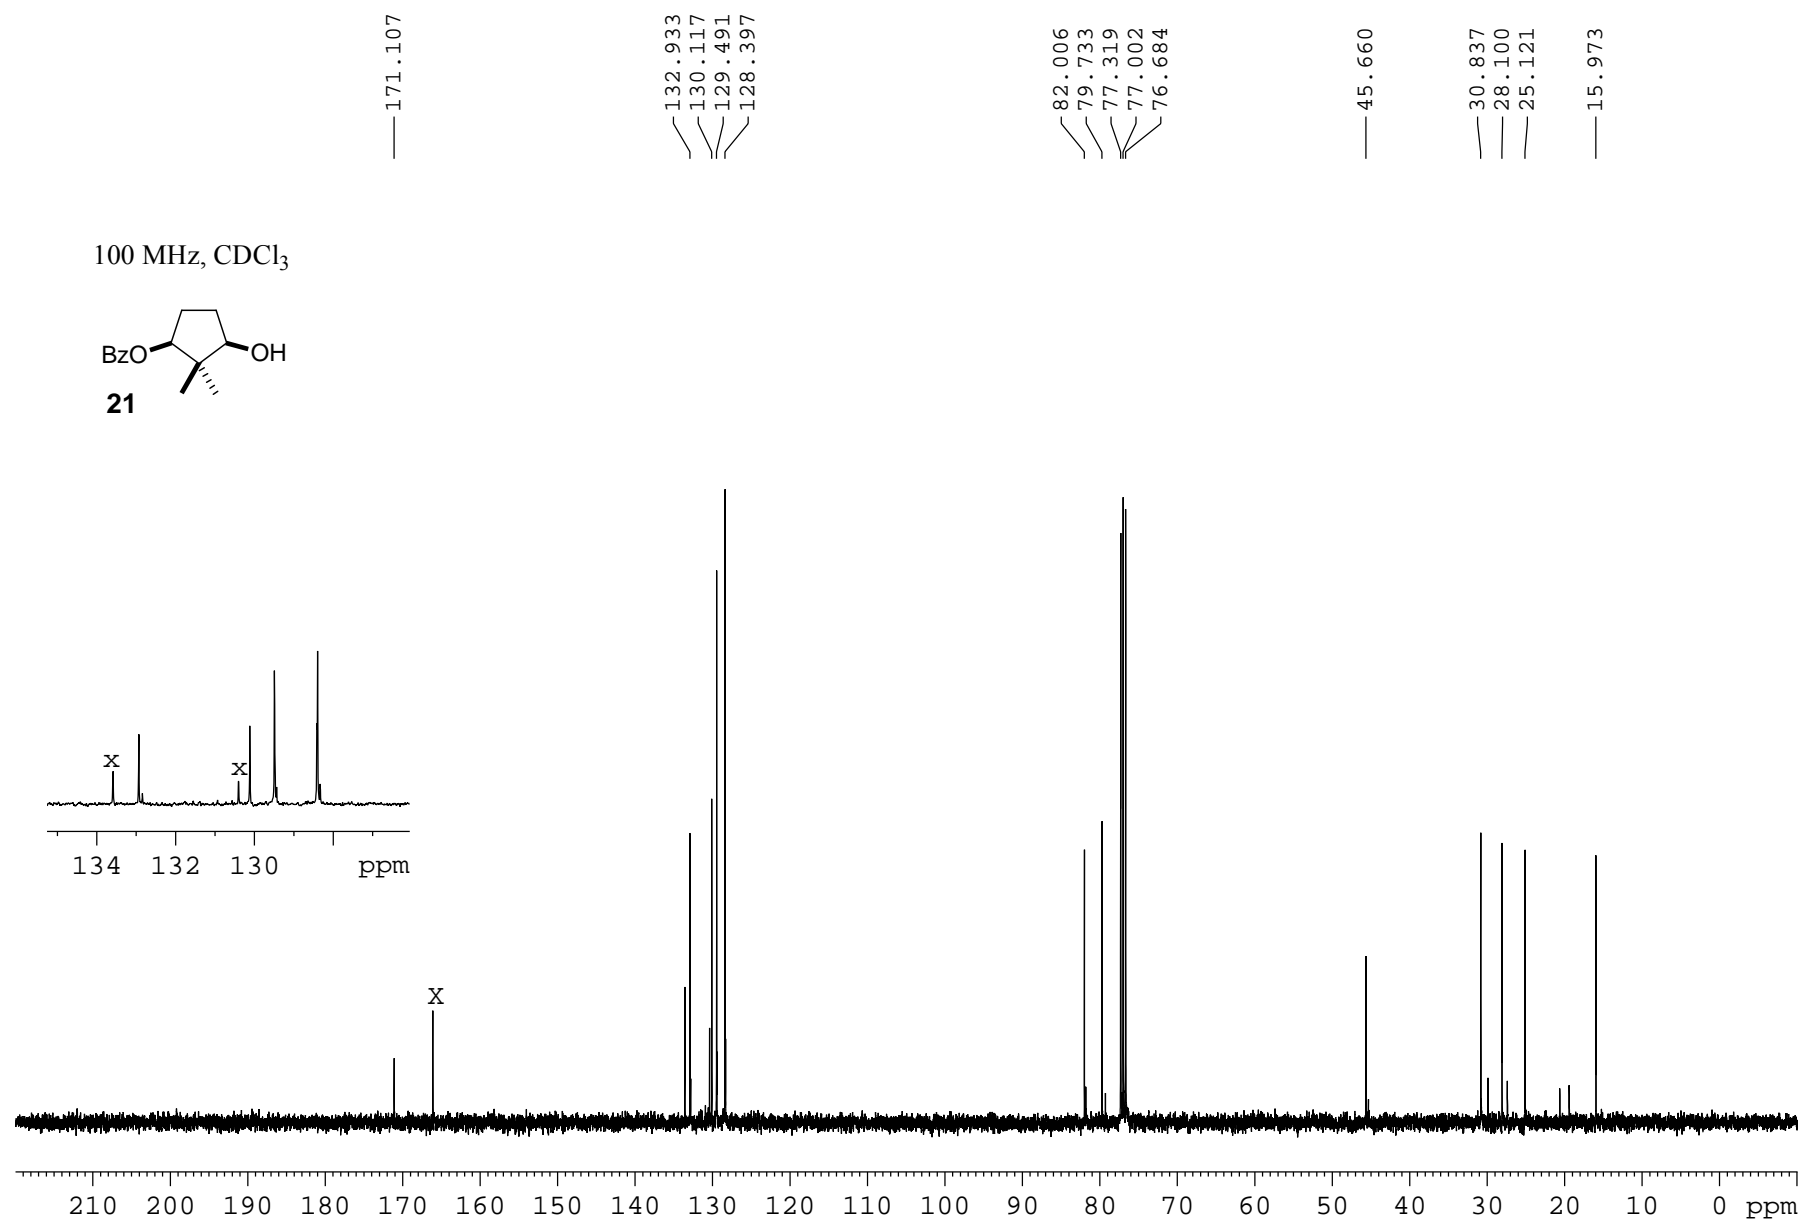

400 MHz, CDCl<sub>3</sub>

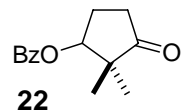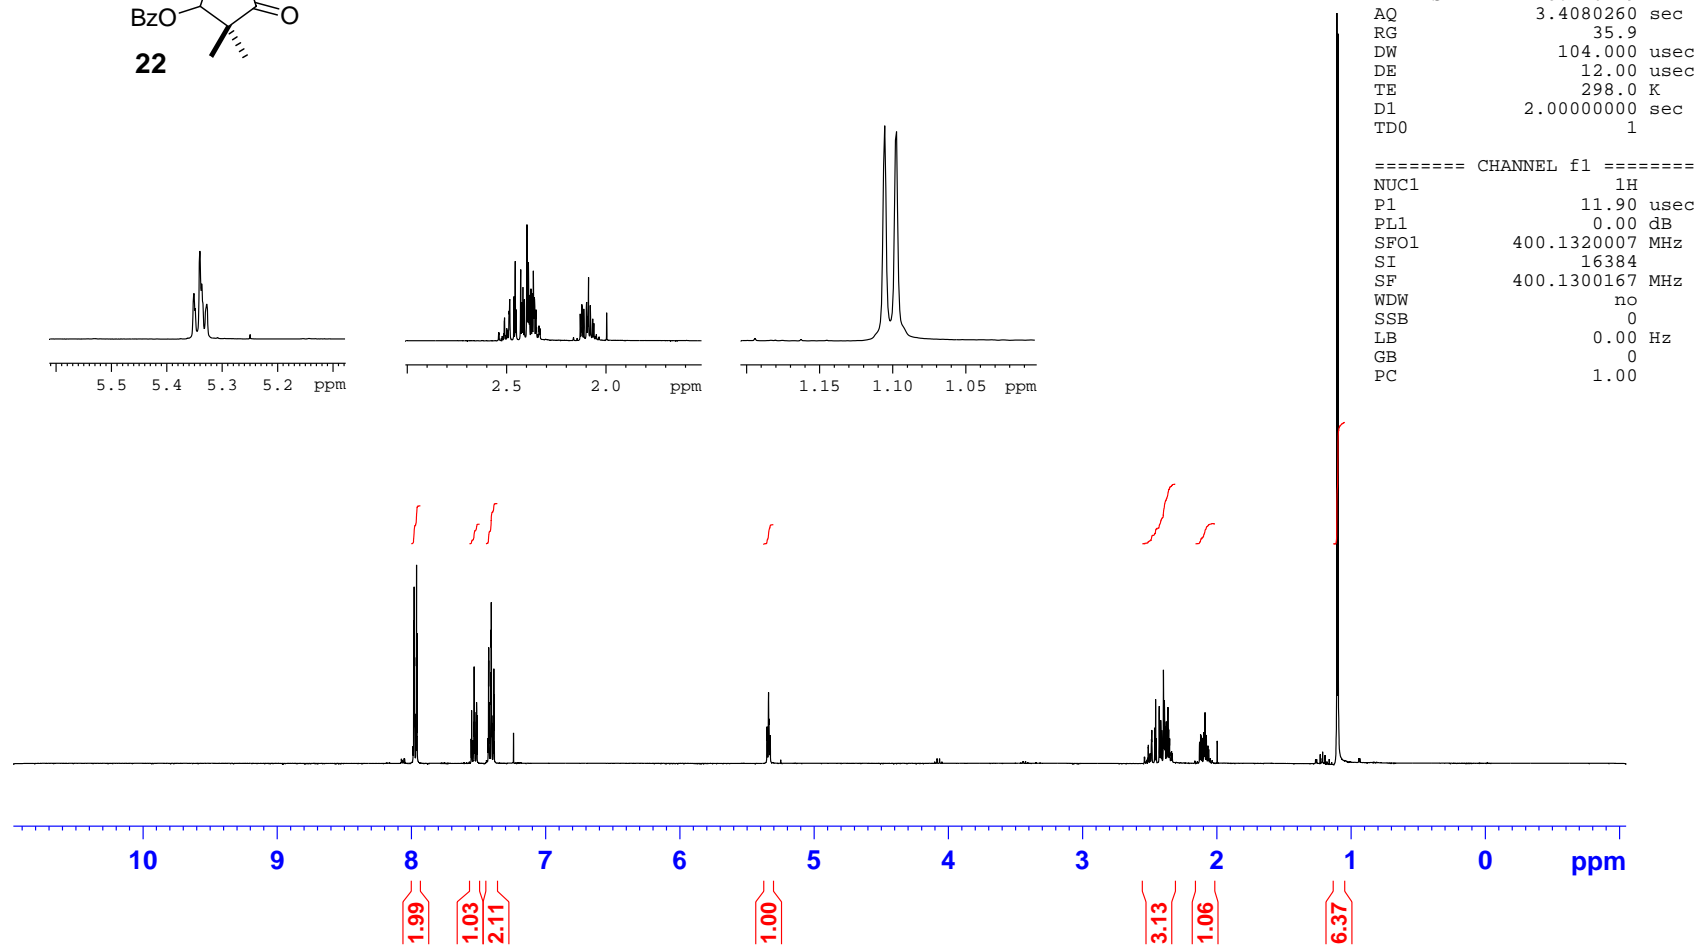

```

NAME      OL_400CKR_7
EXPNO     1
PROCNO    1
Date_     20100810
Time      10.29
INSTRUM   spect
PROBHD    5 mm Multinucl
PULPROG   zg45
TD        32768
SOLVENT   CDCl3
NS        32
DS        0
SWH       4807.692 Hz
FIDRES    0.146719 Hz
AQ        3.4080260 sec
RG        35.9
DW        104.000 usec
DE        12.00 usec
TE        298.0 K
D1        2.00000000 sec
TD0       1

===== CHANNEL f1 =====
NUC1      1H
P1        11.90 usec
PL1       0.00 dB
SFO1     400.1320007 MHz
SI        16384
SF        400.1300167 MHz
WDW       no
SSB       0
LB        0.00 Hz
GB        0
PC        1.00
  
```

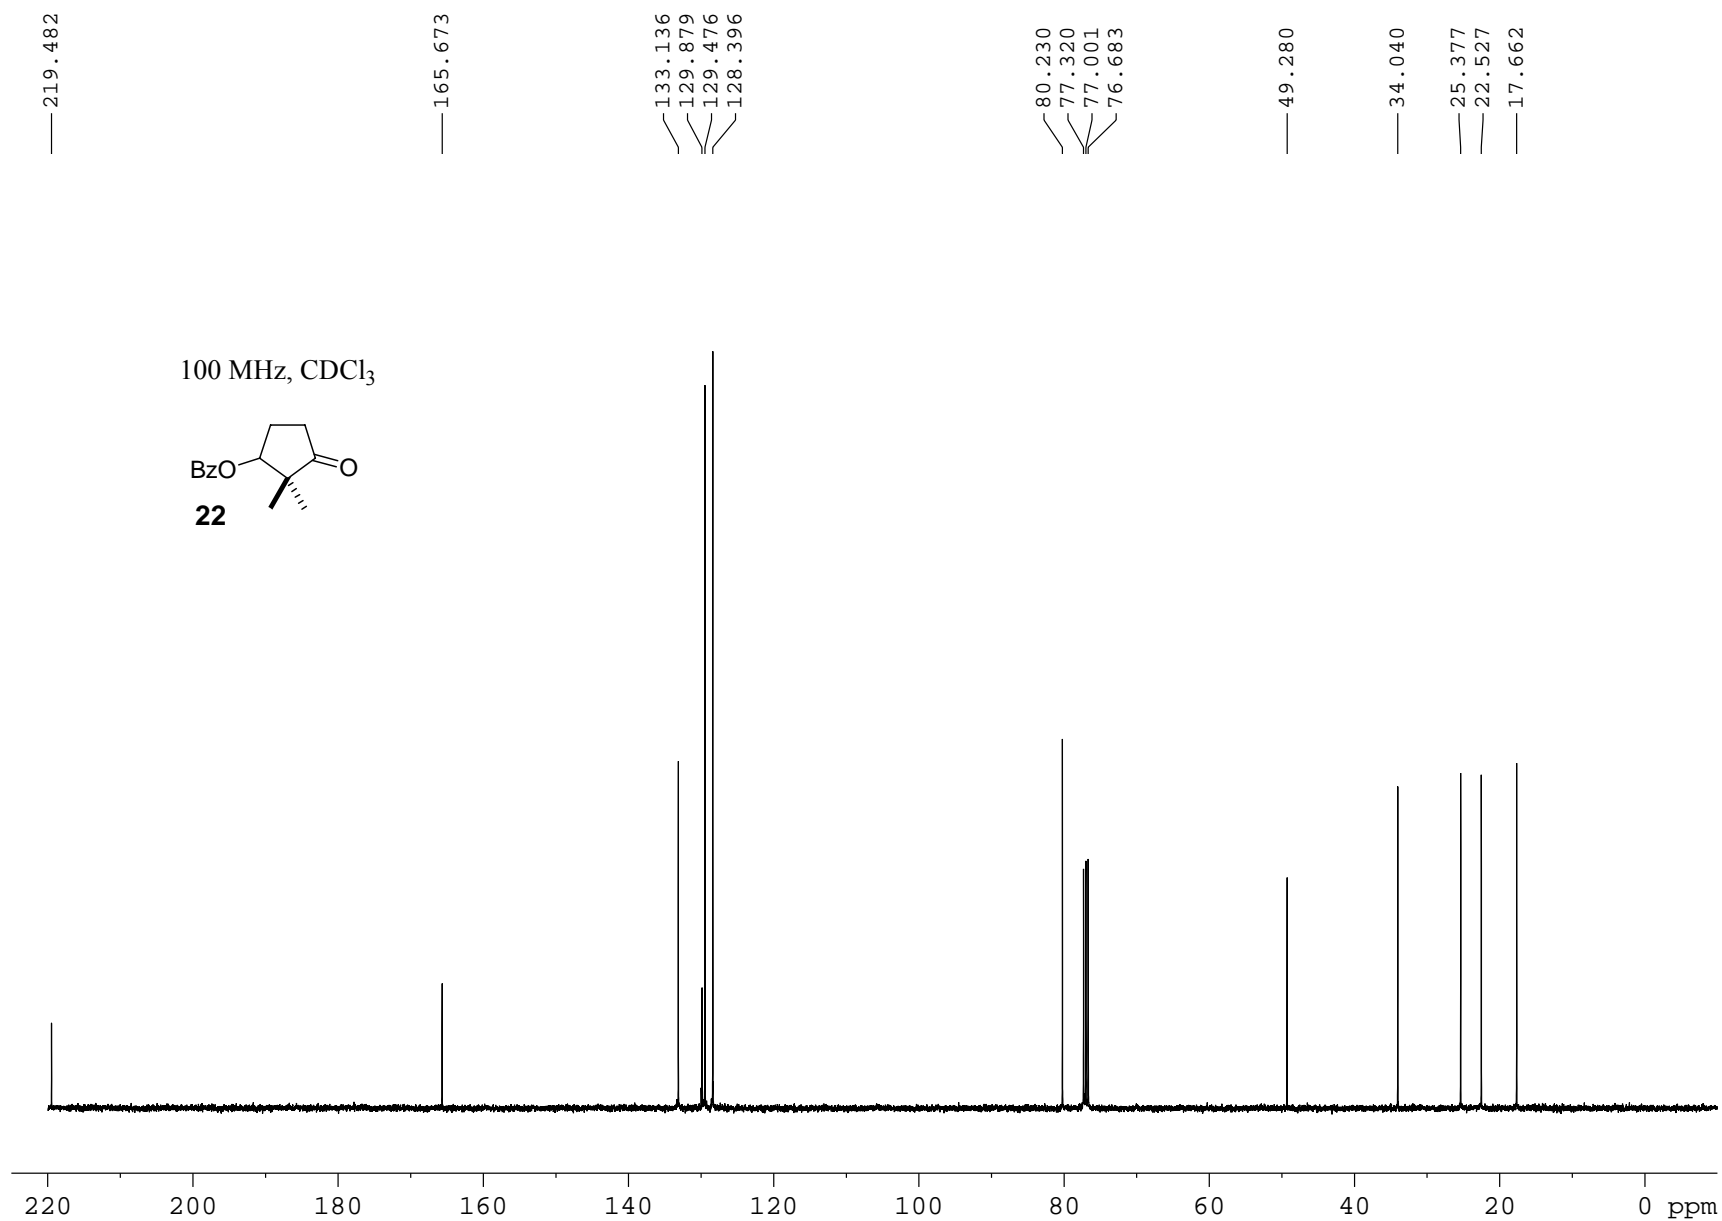

400 MHz, CDCl<sub>3</sub>

**23**

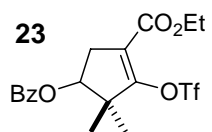

```

NAME      OL_400CKR_26
EXPNO     1
PROCNO    1
Date_     20100810
Time      10.51
INSTRUM   spect
PROBHD    5 mm Multinucl
PULPROG   zg45
TD        32768
SOLVENT   CDCl3
NS        32
DS        0
SWH       4807.692 Hz
FIDRES    0.146719 Hz
AQ        3.4080260 sec
RG        64
DW        104.000 usec
DE        12.00 usec
TE        298.0 K
D1        2.00000000 sec
TD0       1
  
```

```

===== CHANNEL f1 =====
NUC1      1H
P1        11.90 usec
PL1       0.00 dB
SFO1      400.1320007 MHz
SI        16384
SF        400.1300167 MHz
WDW       no
SSB       0
LB        0.00 Hz
GB        0
PC        1.00
  
```

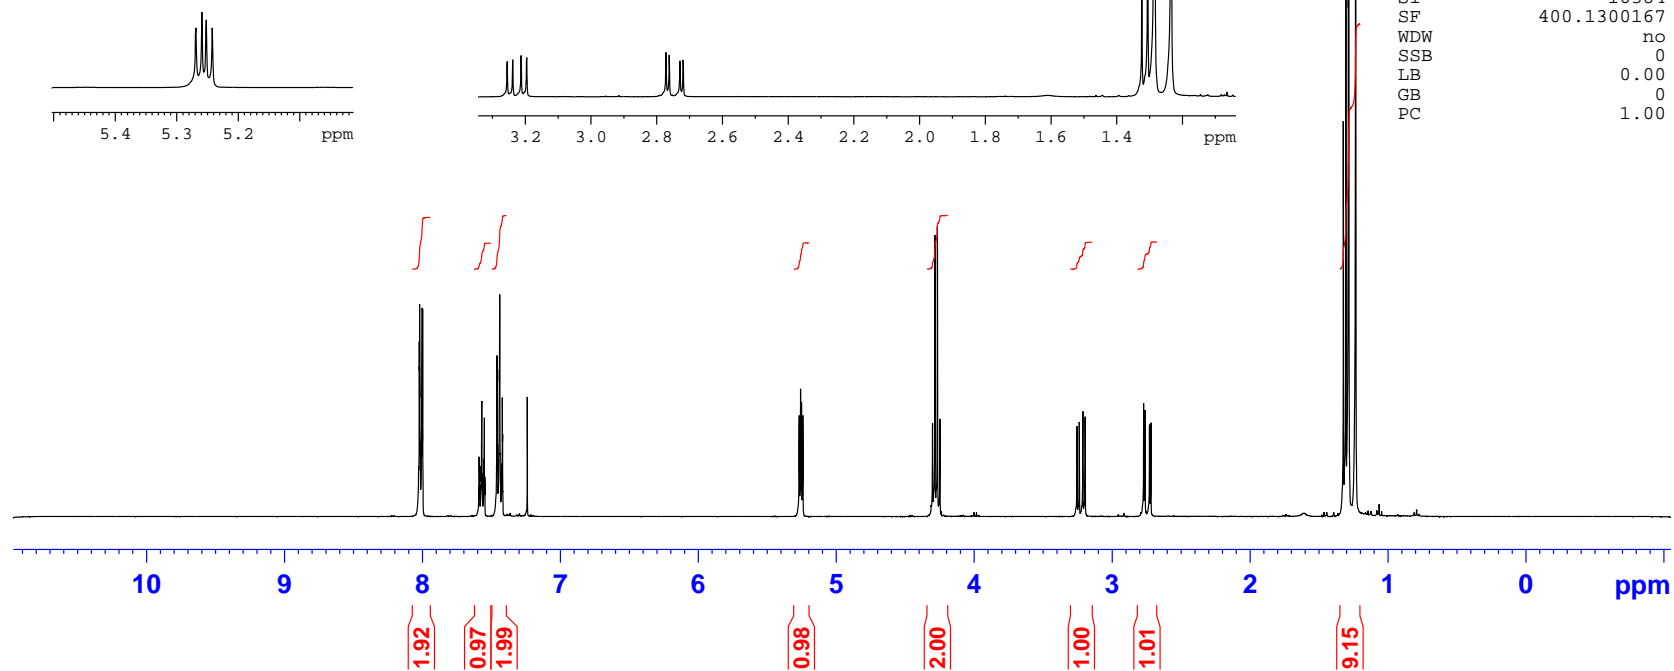

100 MHz, CDCl<sub>3</sub>

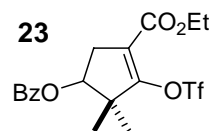

— 165.818  
— 162.080  
— 156.264

— 133.398  
— 123.245  
— 120.064  
— 118.682  
— 116.878

77.318  
76.999  
76.913  
76.682

— 61.477

— 48.624

— 34.288

— 23.396

— 18.092

— 13.999

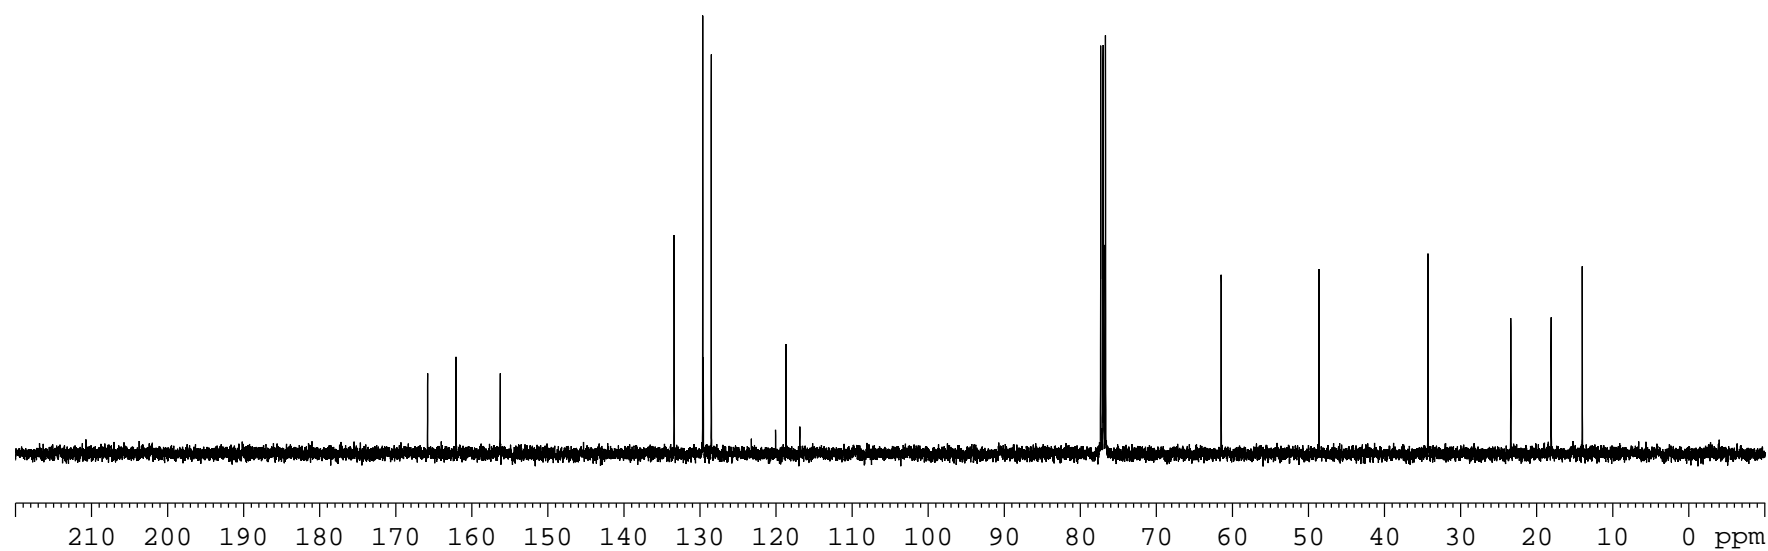



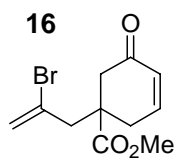

400 MHz, CDCl<sub>3</sub>

```

NAME      OLscA50C5
EXPNO     1
PROCNO    1
Date_     20110214
Time      13.15
INSTRUM   spect
PROBHD    5 mm Multinucl
PULPROG   zg45
TD        32768
SOLVENT   CDCl3
NS        24
DS        0
SWH       4807.692 Hz
FIDRES    0.146719 Hz
AQ        3.4080260 sec
RG        128
DW        104.000 usec
DE        12.00 usec
TE        298.0 K
D1        2.00000000 sec
TD0       1

```

```

===== CHANNEL f1 =====
NUC1      1H
P1        12.00 usec
PL1       0.00 dB
SFO1      400.1320007 MHz
SI        16384
SF        400.1300174 MHz
WDW       no
SSB       0
LB        0.00 Hz
GB        0
PC        1.00

```

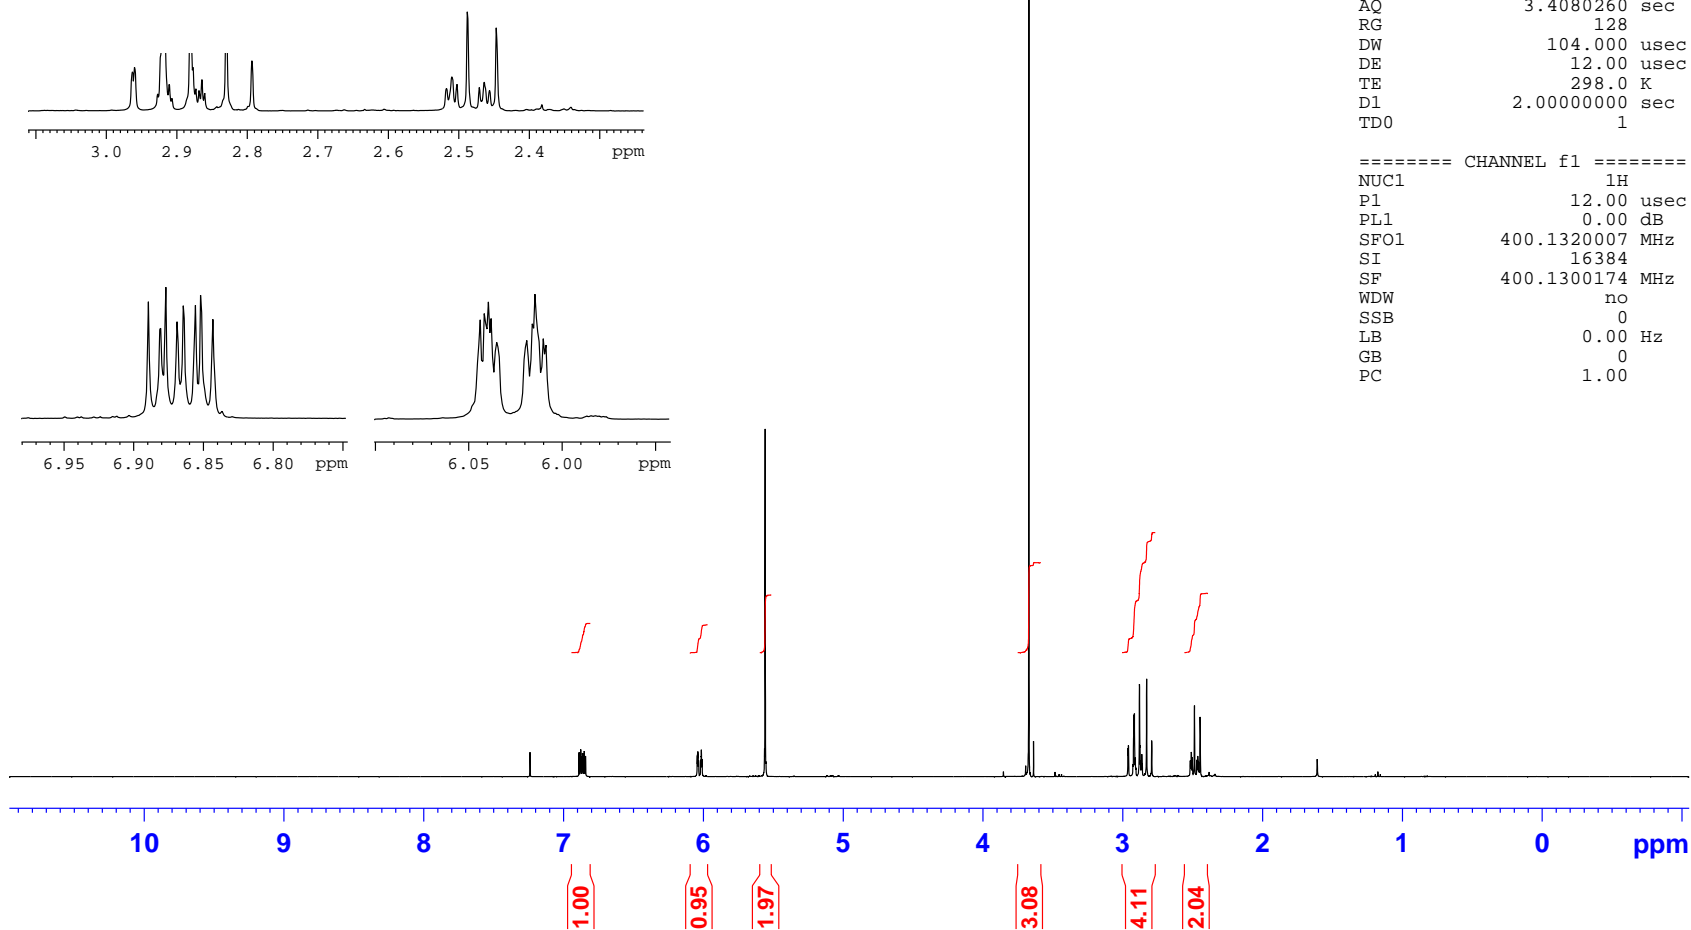

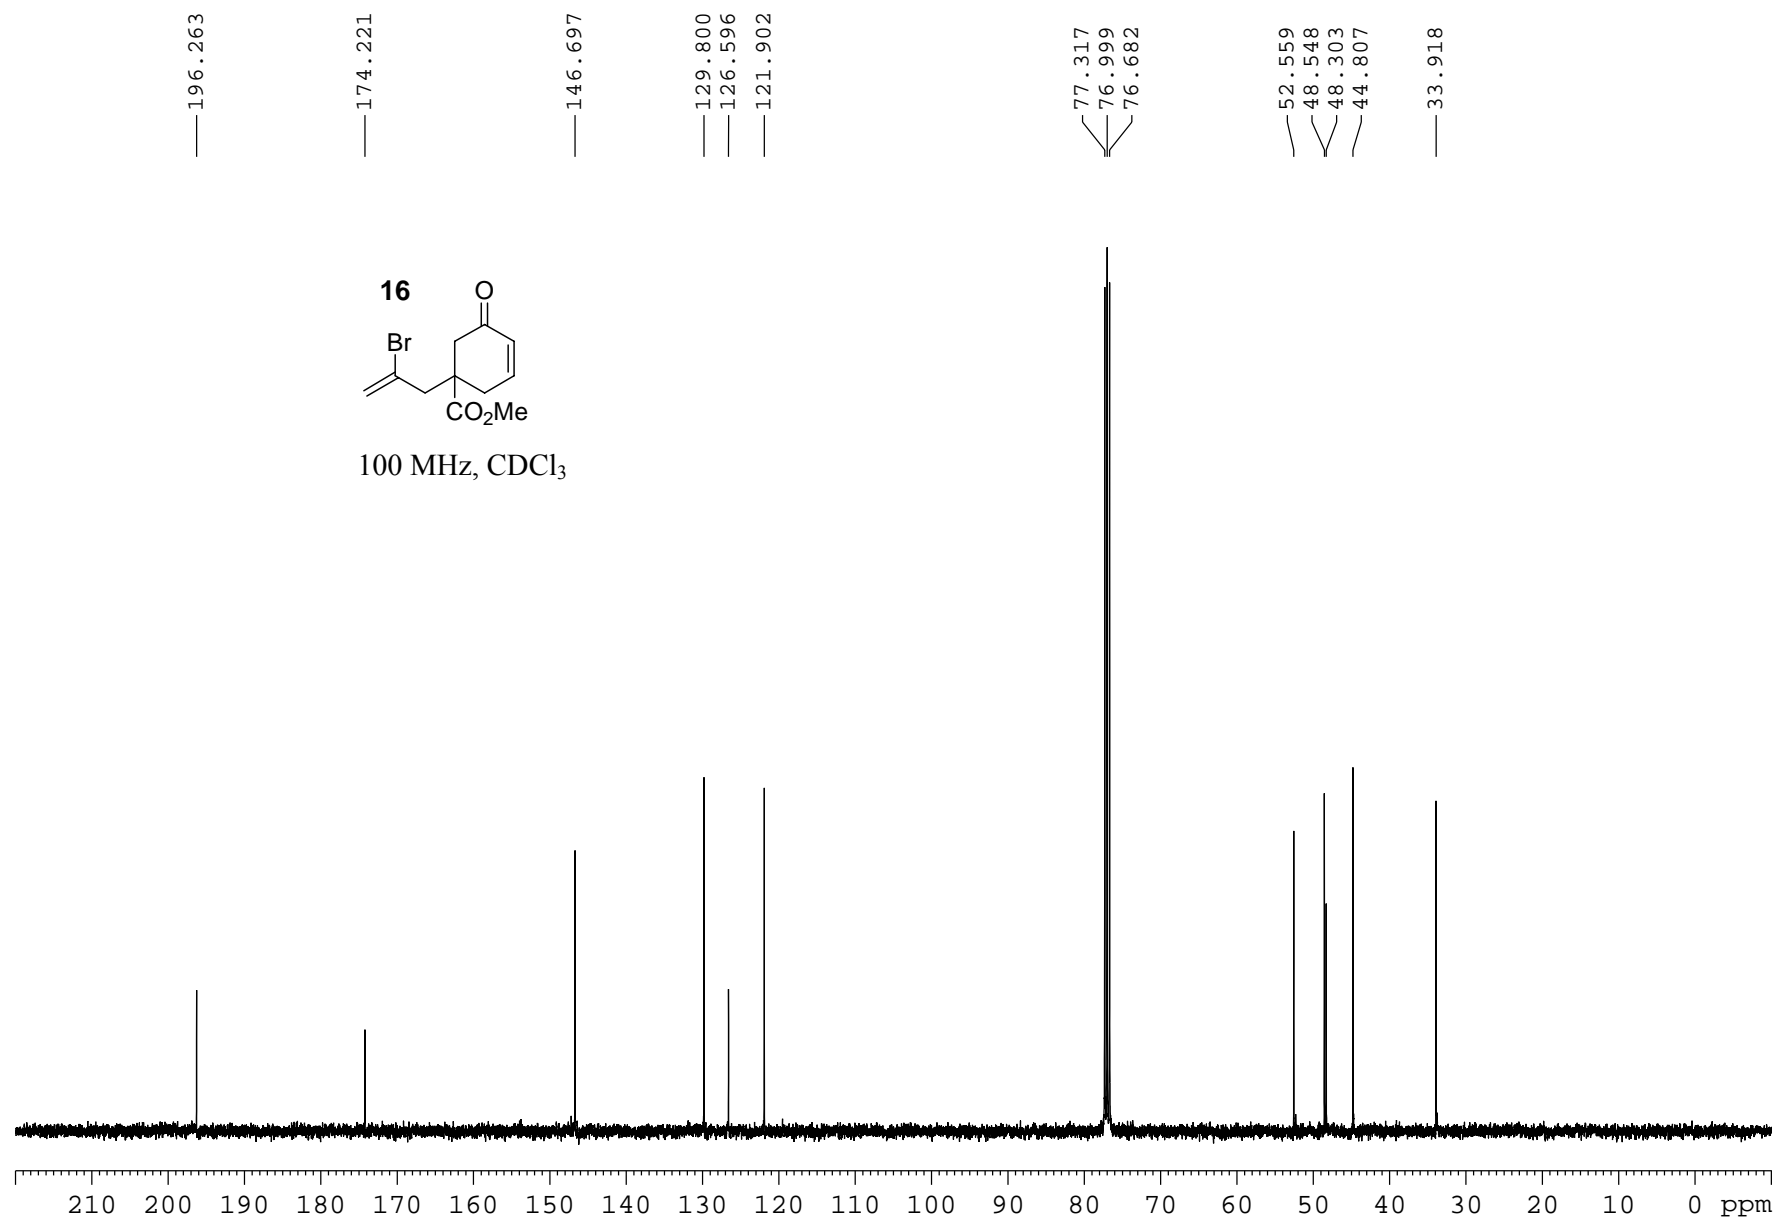

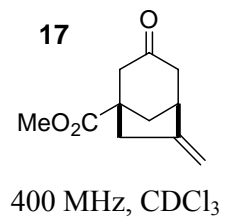

```

NAME      OLscA52wuF3to5
EXPNO     1
PROCNO    1
Date_     20110214
Time      14.15
INSTRUM   spect
PROBHD    5 mm Multinucl
PULPROG   zg45
TD        32768
SOLVENT   CDCl3
NS        32
DS        0
SWH       4807.692 Hz
FIDRES    0.146719 Hz
AQ        3.4080260 sec
RG        256
DW        104.000 usec
DE        12.00 usec
TE        298.0 K
D1        2.00000000 sec
TD0       1

```

```

===== CHANNEL f1 =====
NUC1      1H
P1        12.00 usec
PL1       0.00 dB
SFO1      400.1320007 MHz
SI        16384
SF        400.1300174 MHz
WDW       no
SSB       0
LB        0.00 Hz
GB        0
PC        1.00

```

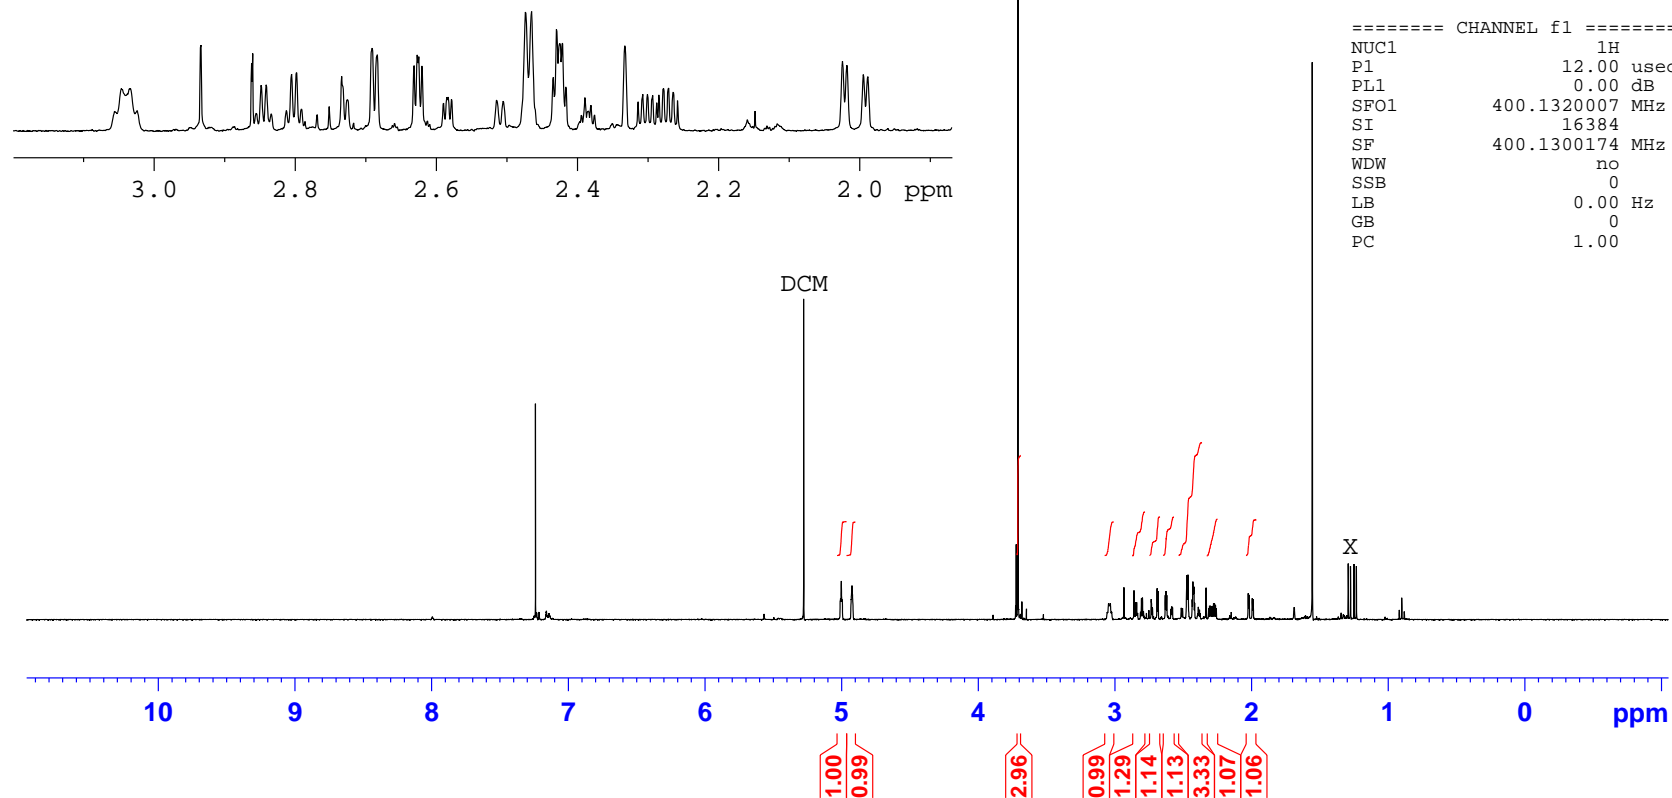

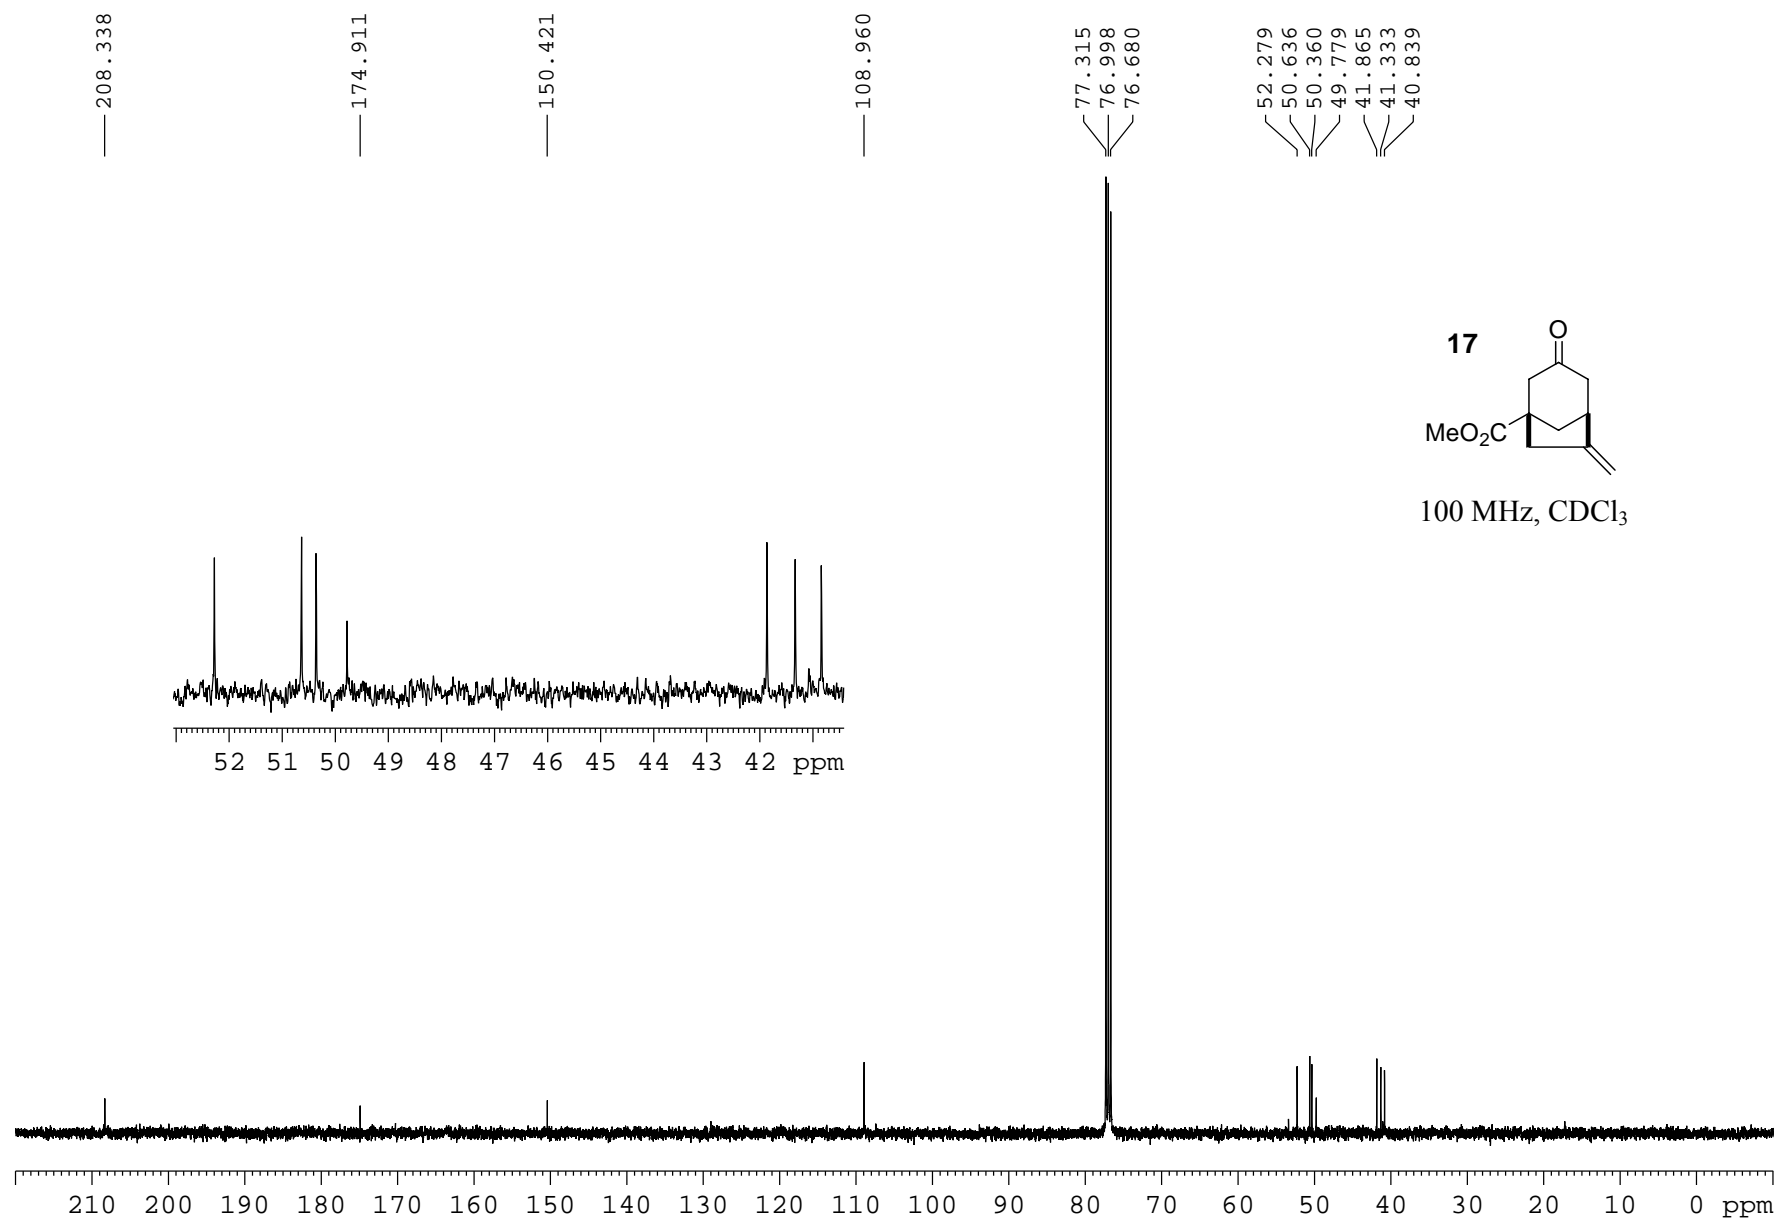

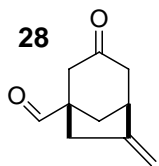

400 MHz, CDCl<sub>3</sub>

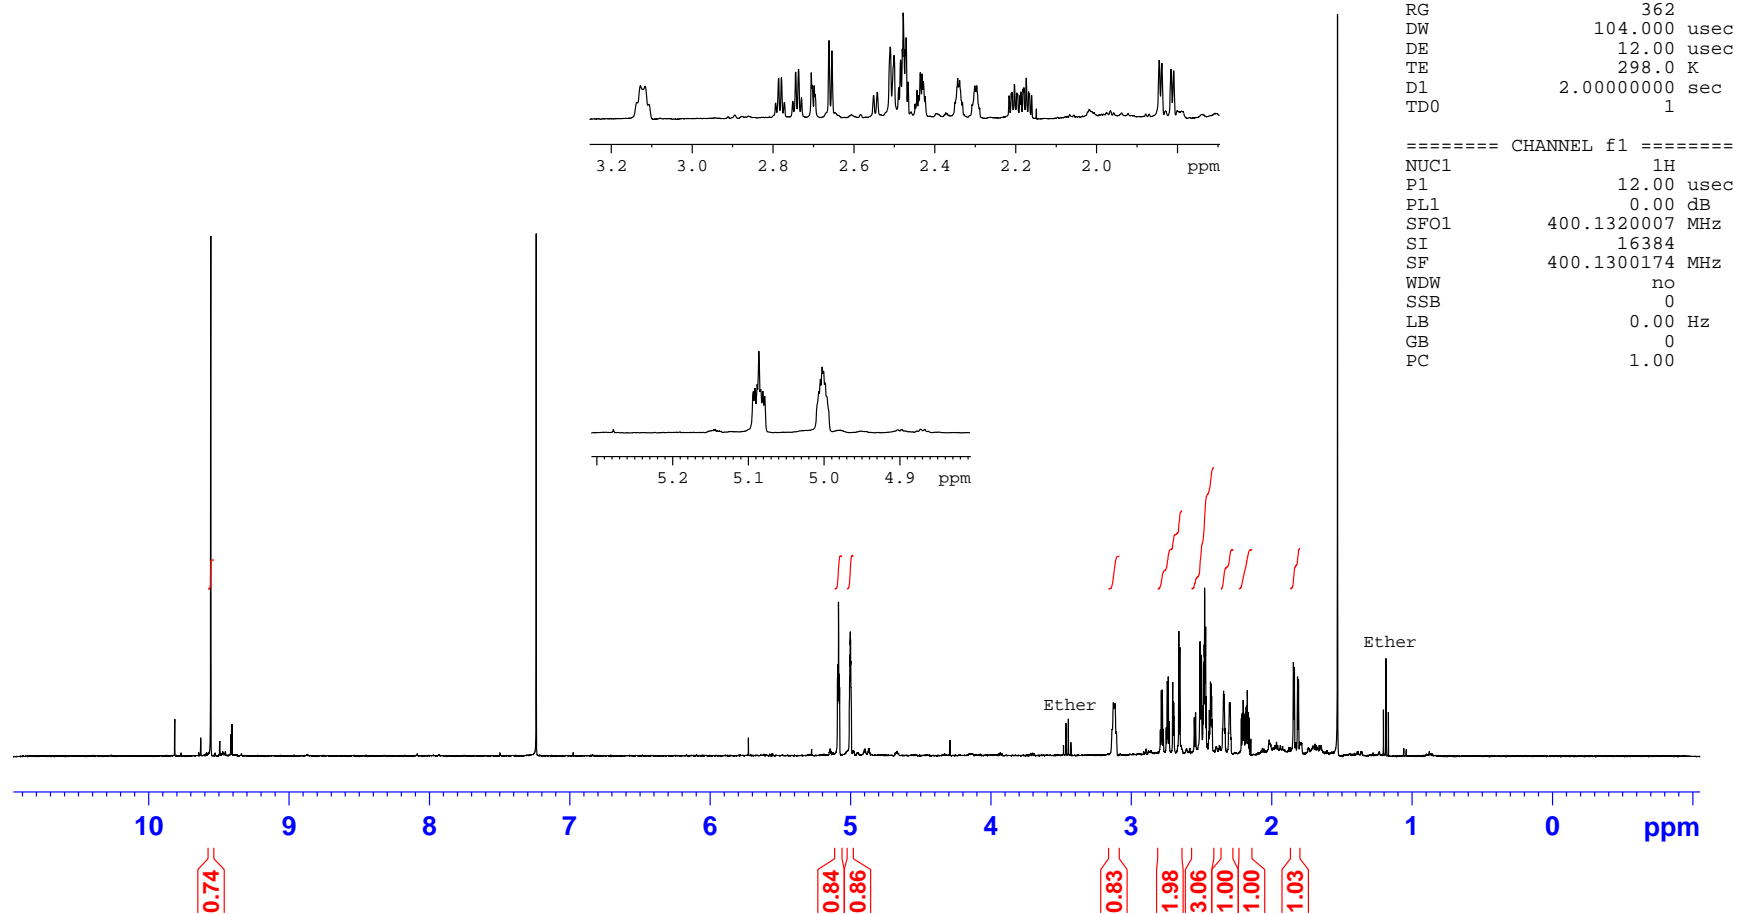

```

NAME      400scA63Plwu
EXPNO     1
PROCNO    1
Date_     20110304
Time      17.30
INSTRUM   spect
PROBHD    5 mm Multinucl
PULPROG   zg45
TD        32768
SOLVENT   CDCl3
NS        16
DS        0
SWH       4807.692 Hz
FIDRES    0.146719 Hz
AQ        3.4080260 sec
RG        362
DW        104.000 usec
DE        12.00 usec
TE        298.0 K
D1        2.00000000 sec
D10       1
  
```

```

===== CHANNEL f1 =====
NUC1      1H
P1        12.00 usec
PL1       0.00 dB
SFO1     400.1320007 MHz
SI        16384
SF        400.1300174 MHz
WDW       no
SSB       0
LB        0.00 Hz
GB        0
PC        1.00
  
```

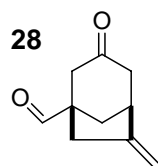

100 MHz, CDCl<sub>3</sub>

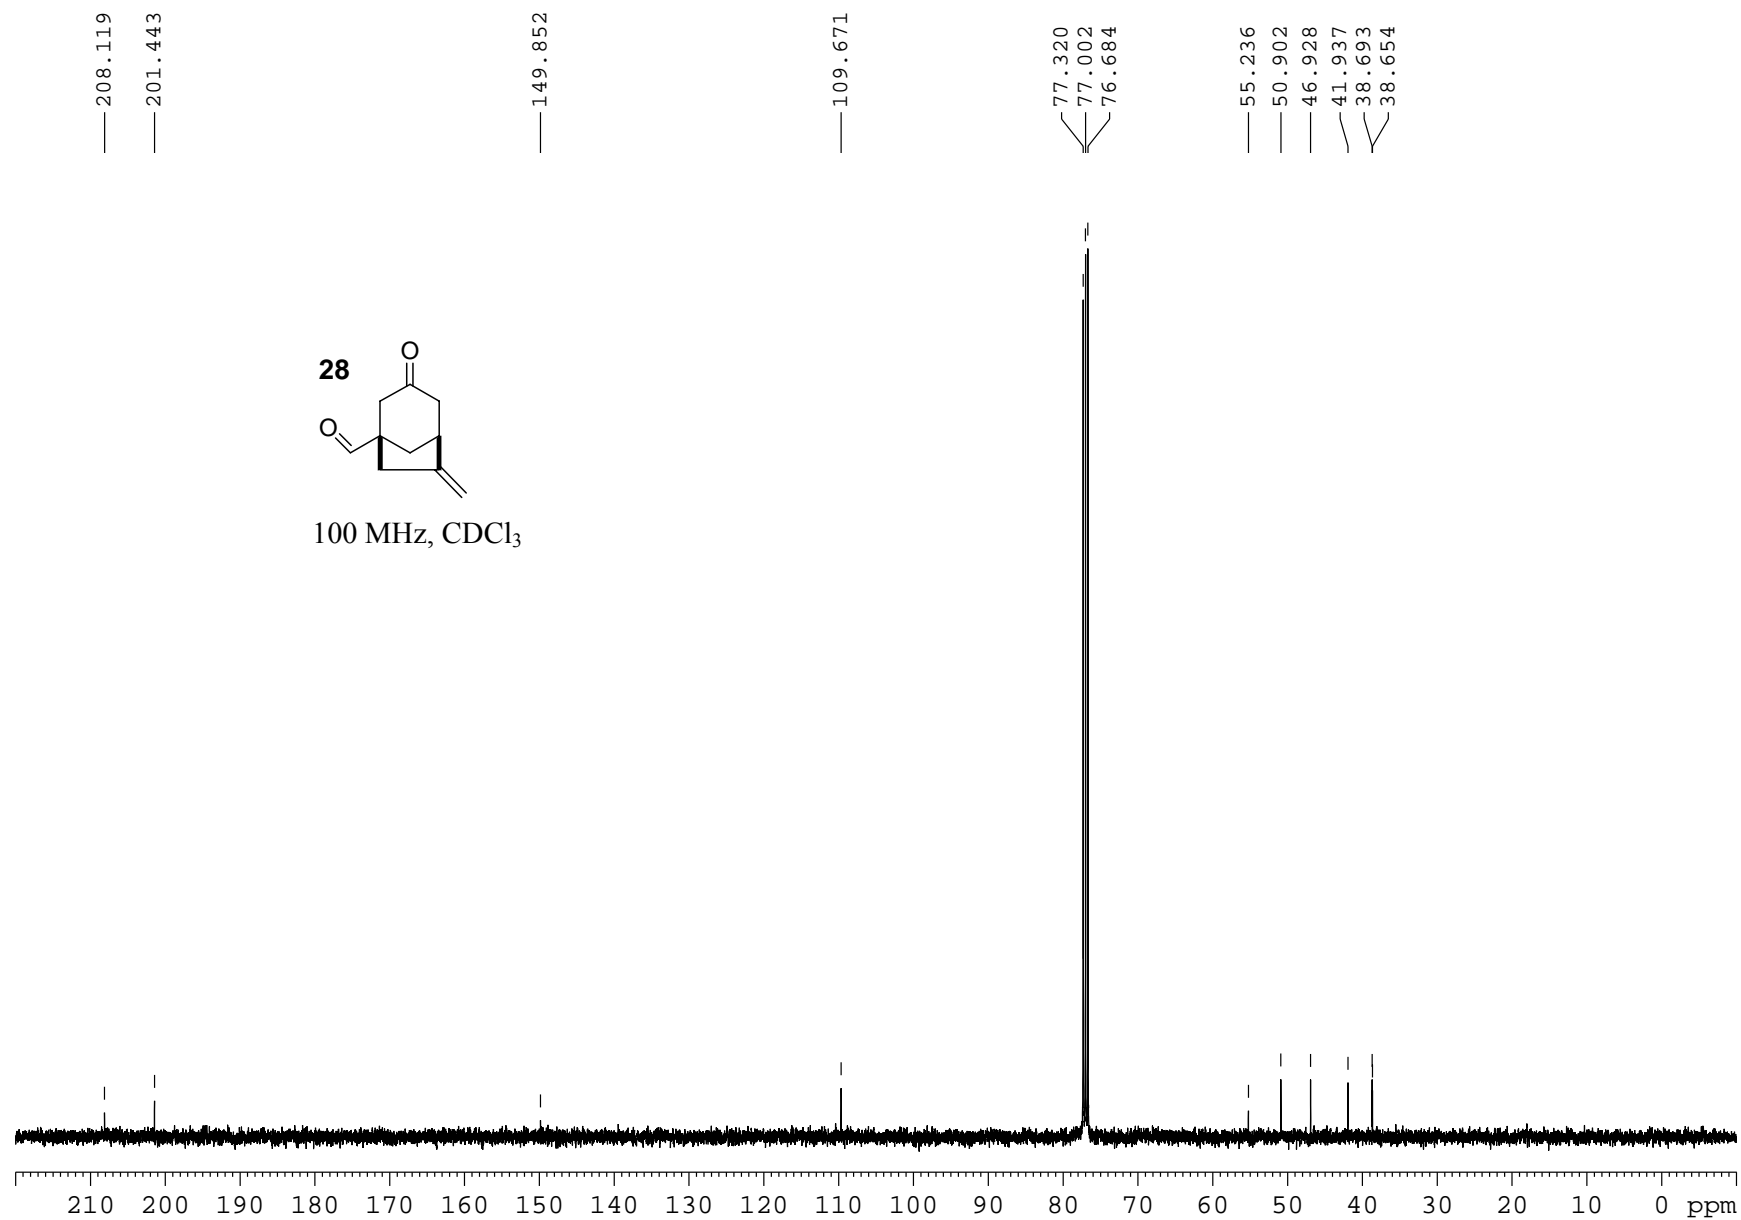

27

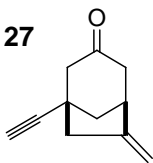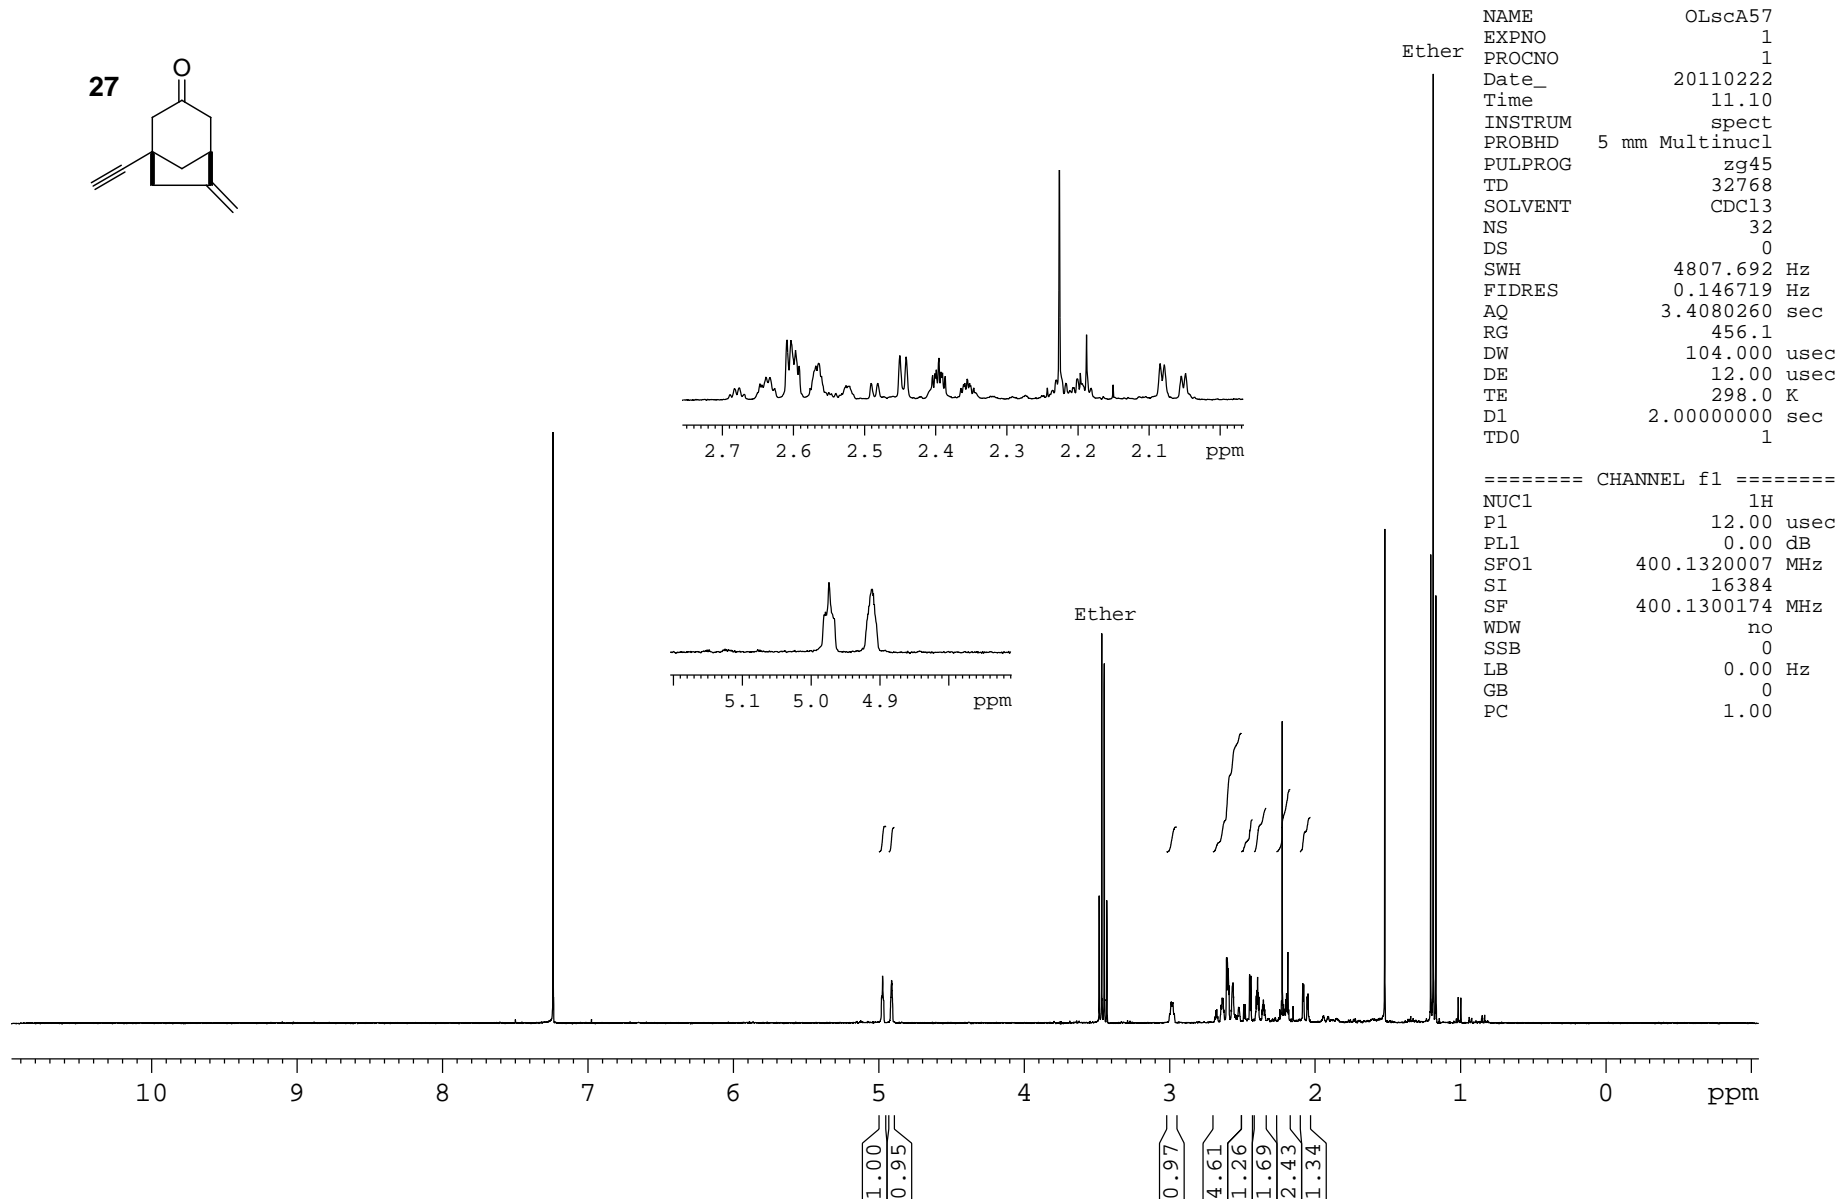

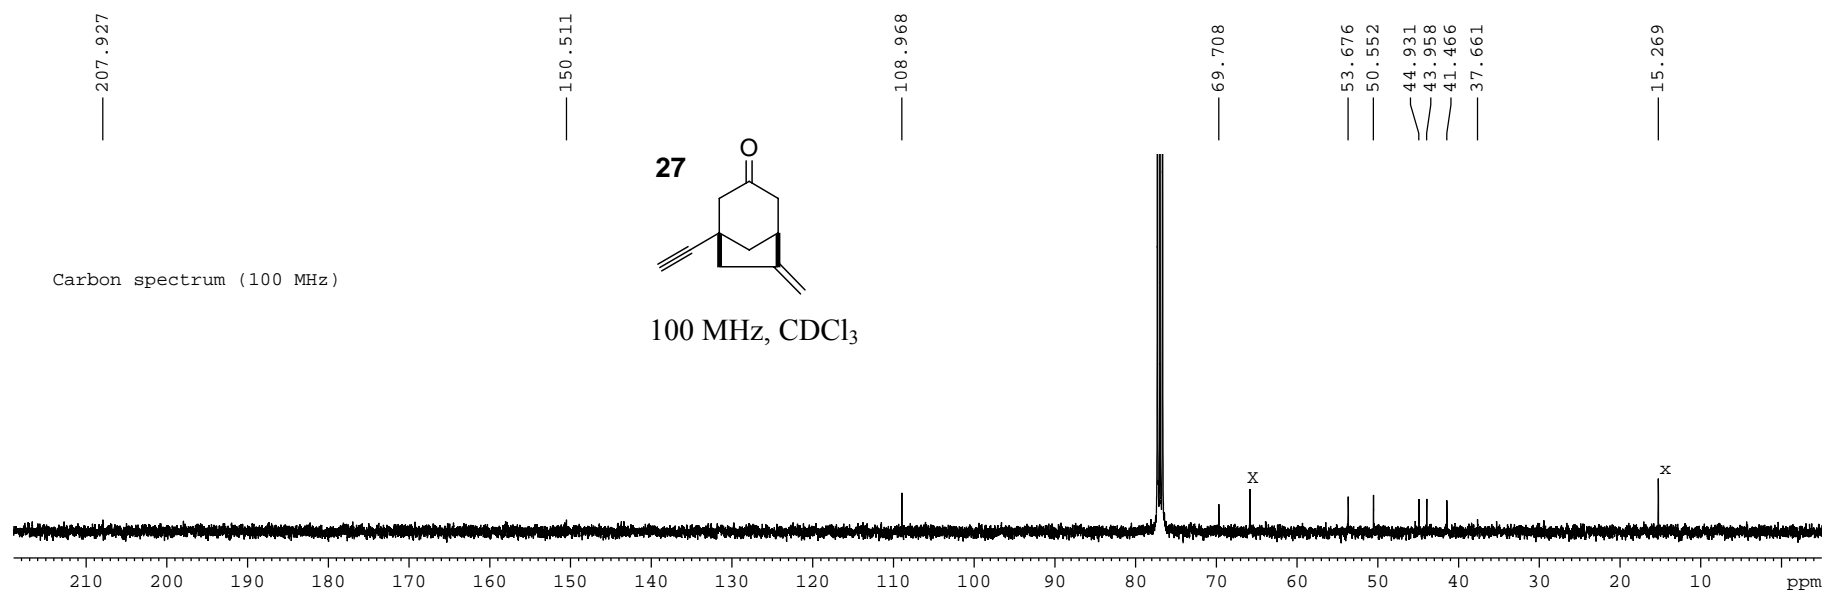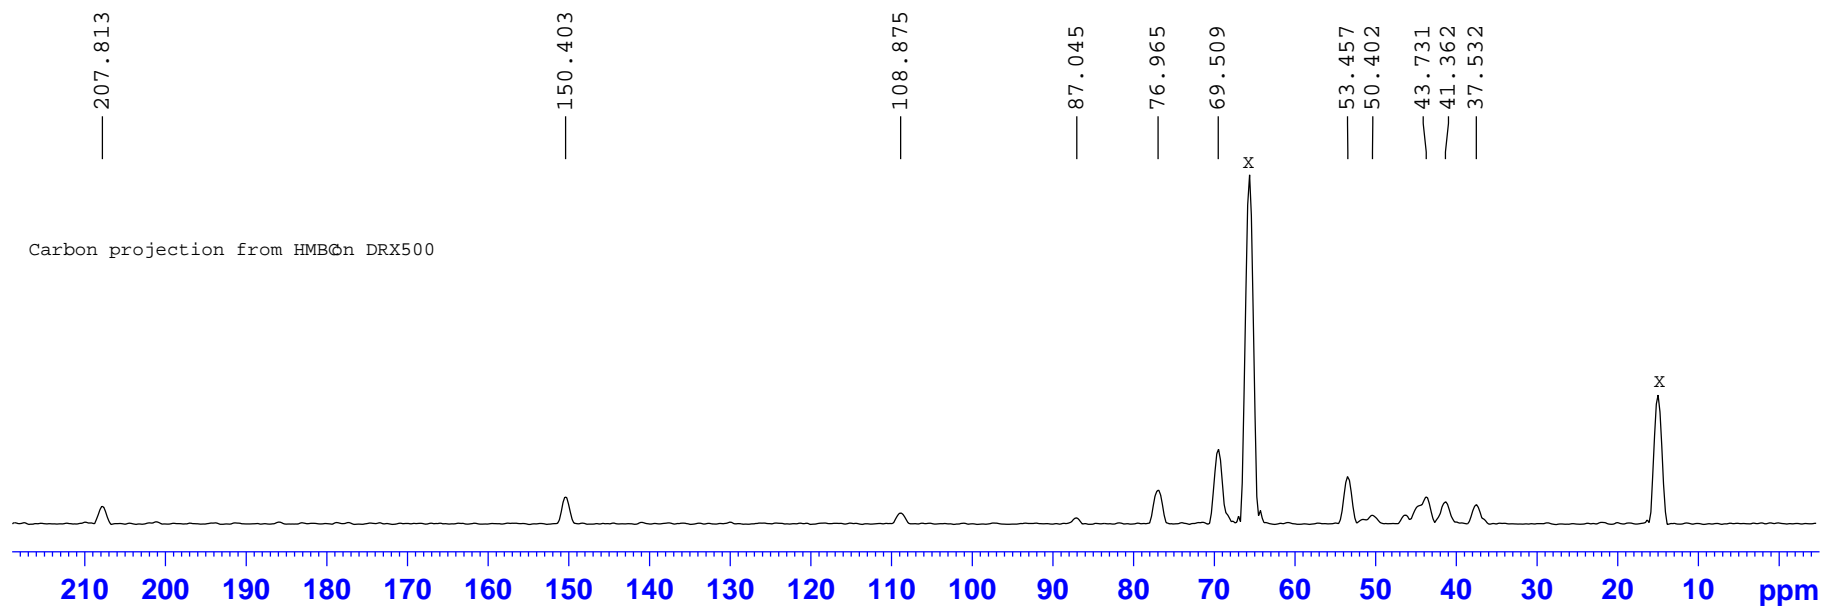



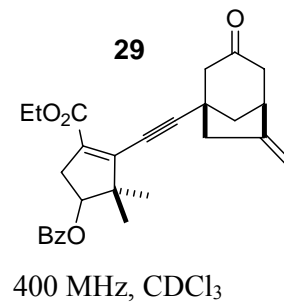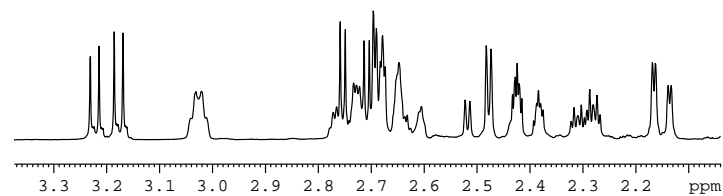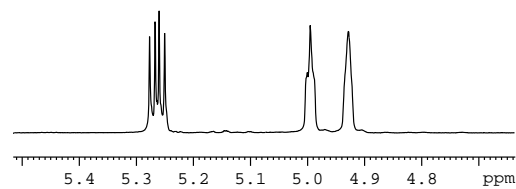

EA = ethyl acetate

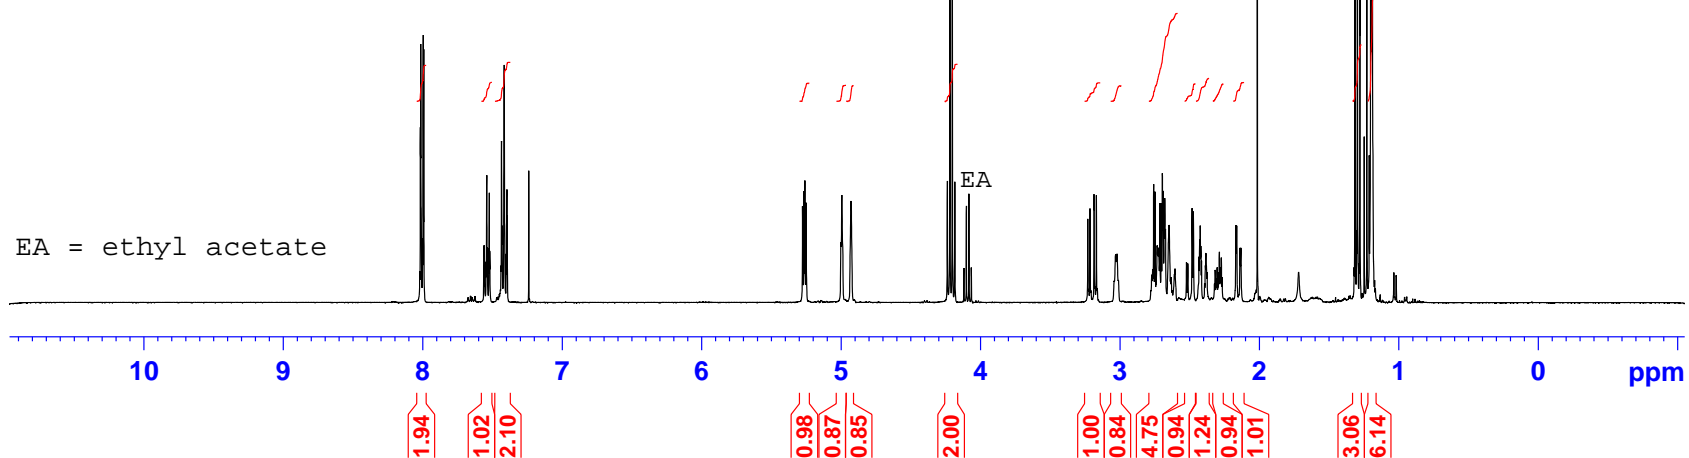

NAME OLscB002C1  
 EXPNO 1  
 PROCNO 1  
 Date\_ 20110324  
 Time 14.08  
 INSTRUM spect  
 PROBHD 5 mm Multinucl  
 PULPROG zg45  
 TD 32768  
 SOLVENT CDCl3  
 NS 16  
 DS 0  
 SWH 4807.692 Hz  
 FIDRES 0.146719 Hz  
 AQ 3.4080260 sec  
 RG 64  
 DW 104.000 usec  
 DE 12.00 usec  
 TE 298.0 K  
 D1 2.00000000 sec  
 TD0 1

===== CHANNEL f1 =====  
 NUC1 1H  
 P1 12.00 usec  
 PL1 0.00 dB  
 SFO1 400.1320007 MHz  
 SI 16384  
 SF 400.1300171 MHz  
 WDW no  
 SSB 0  
 LB 0.00 Hz  
 GB 0  
 PC 1.00

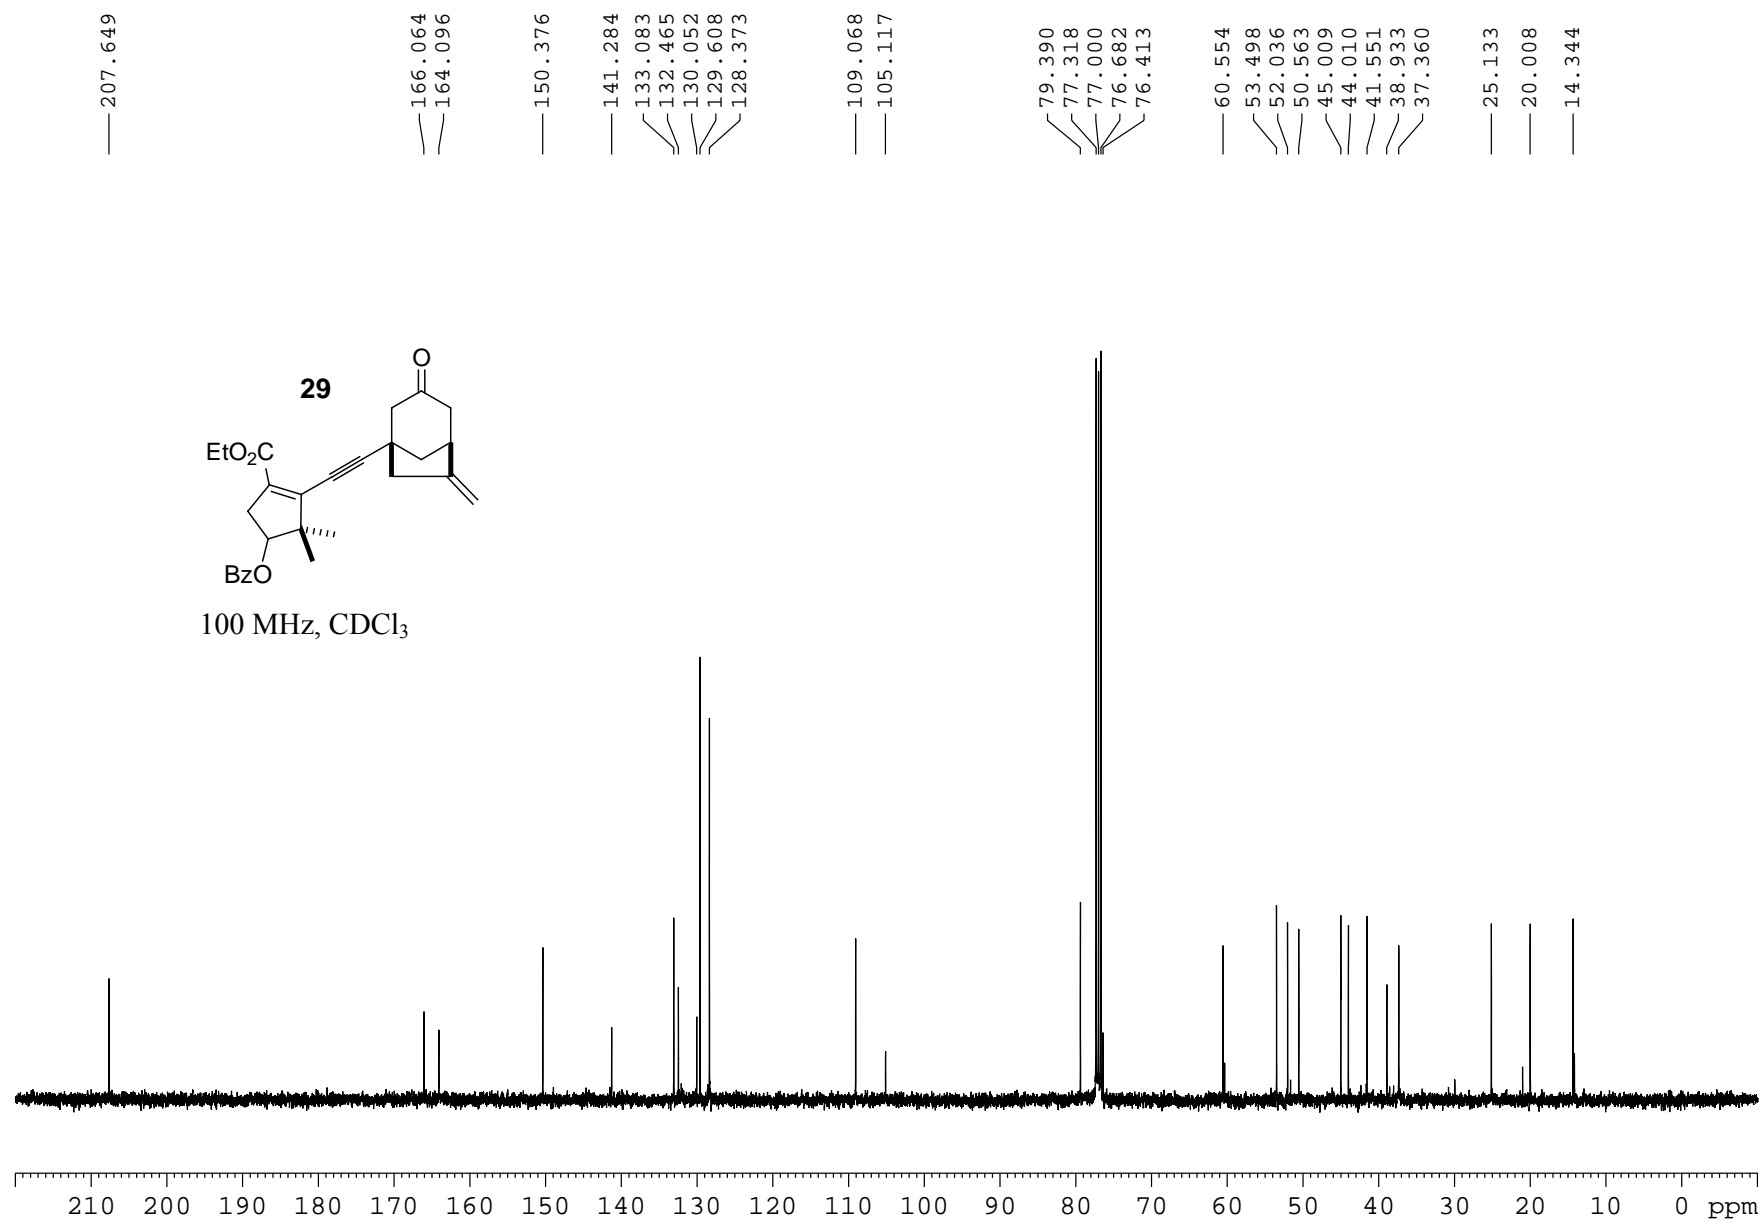

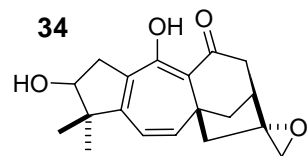

Firstly eluted diastereomer

400 MHz, CDCl<sub>3</sub>

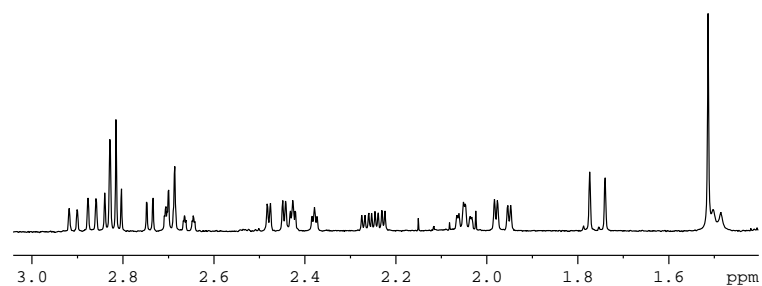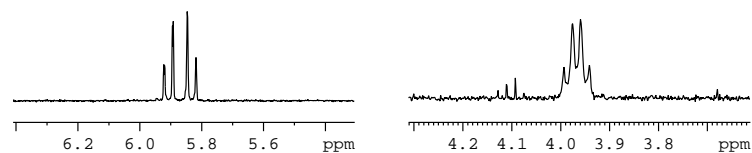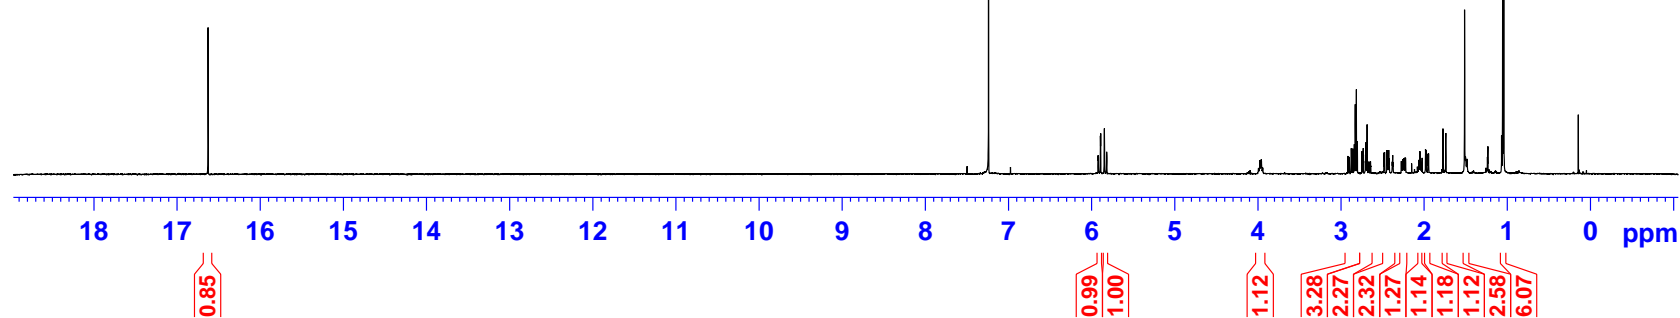

```

NAME      OLscB020n031C1
EXPNO     1
PROCNO    1
Date_     20110707
Time      14.17
INSTRUM   spect
PROBHD    5 mm Multinucl
PULPROG   zg45
TD        32768
SOLVENT   CDCl3
NS        32
DS        0
SWH       8012.820 Hz
FIDRES    0.244532 Hz
AQ        2.0448356 sec
RG        512
DW        62.400 usec
DE        12.00 usec
TE        298.0 K
D1        2.00000000 sec
D10       1
  
```

```

===== CHANNEL f1 =====
NUC1      1H
P1        12.00 usec
PL1       0.00 dB
SFO1      400.1336012 MHz
SI        16384
SF        400.1300173 MHz
WDW       no
SSB       0
LB        0.00 Hz
GB        0
PC        1.00
  
```

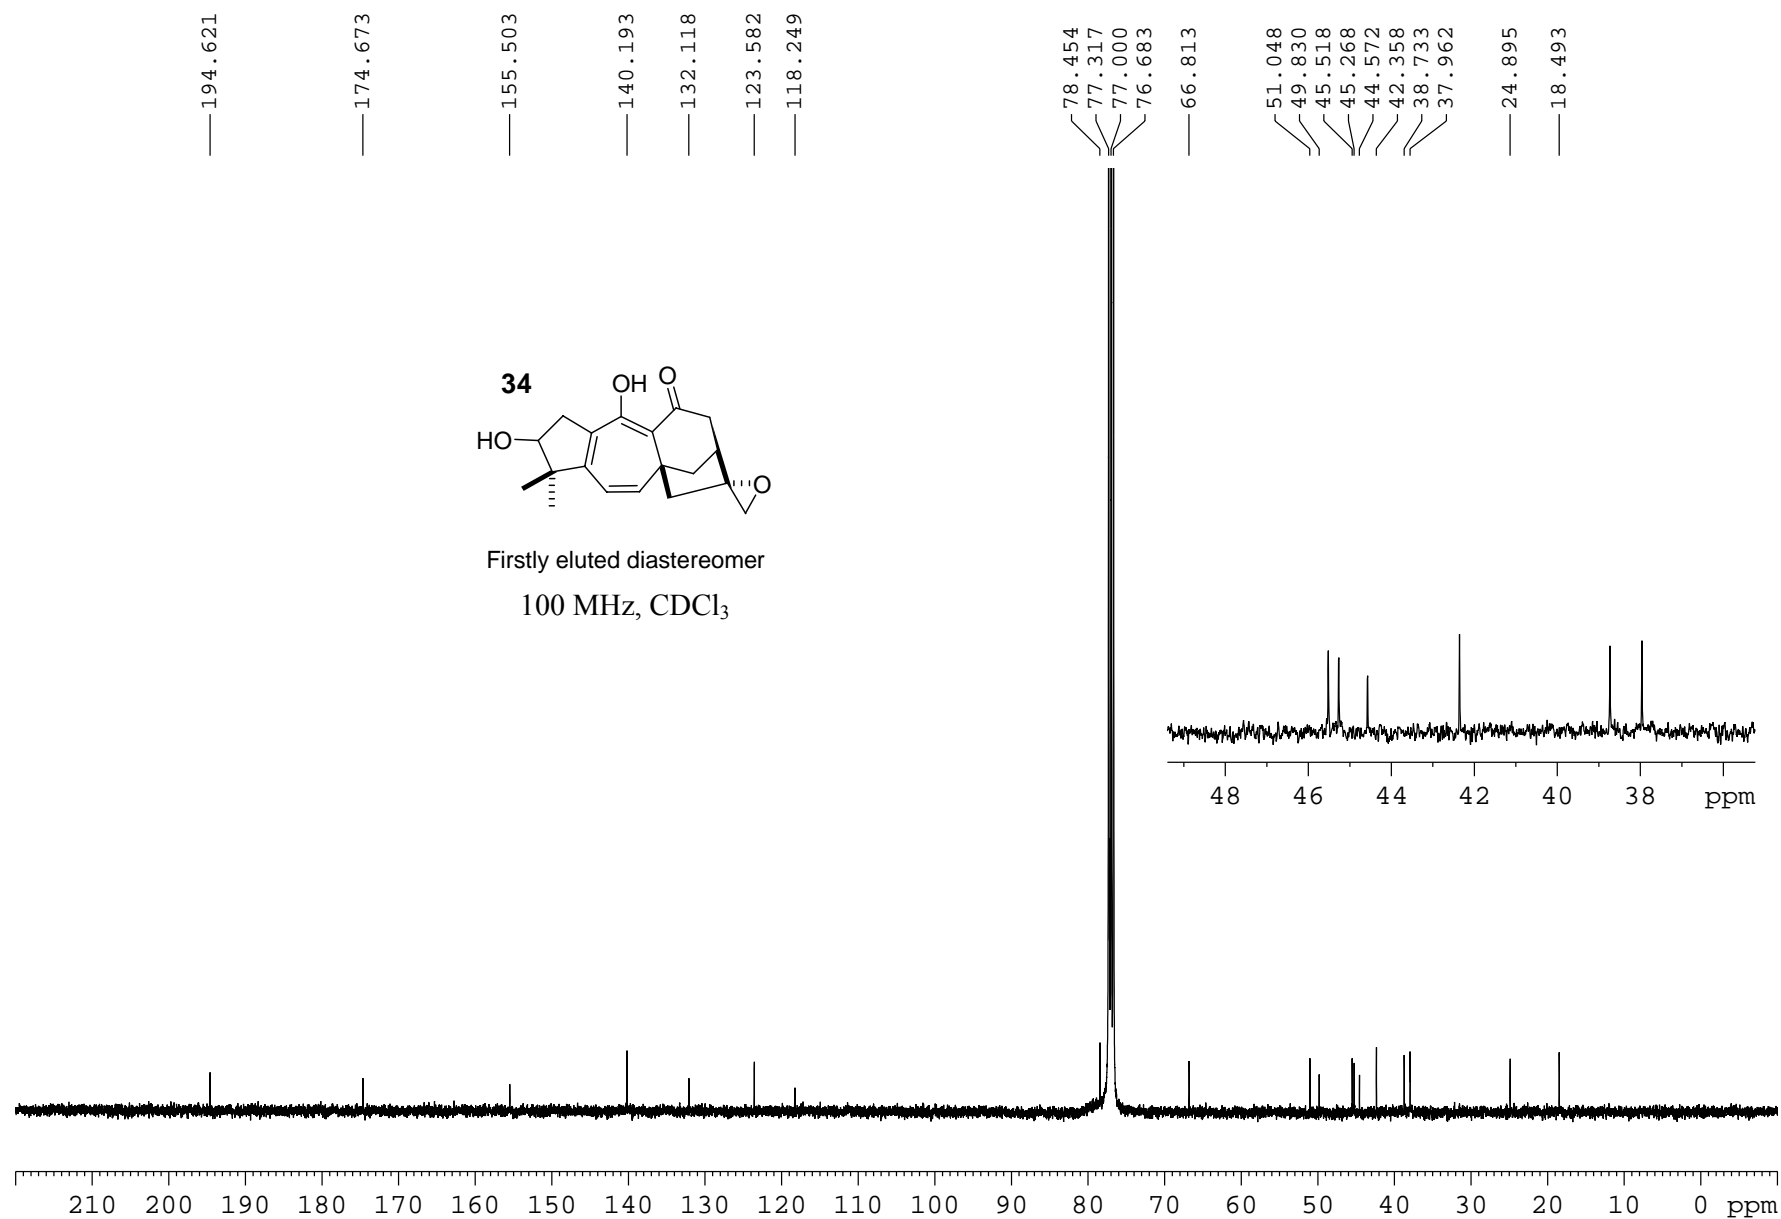

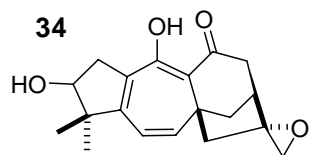

Secondly eluted diastereomer

400 MHz, CDCl<sub>3</sub>

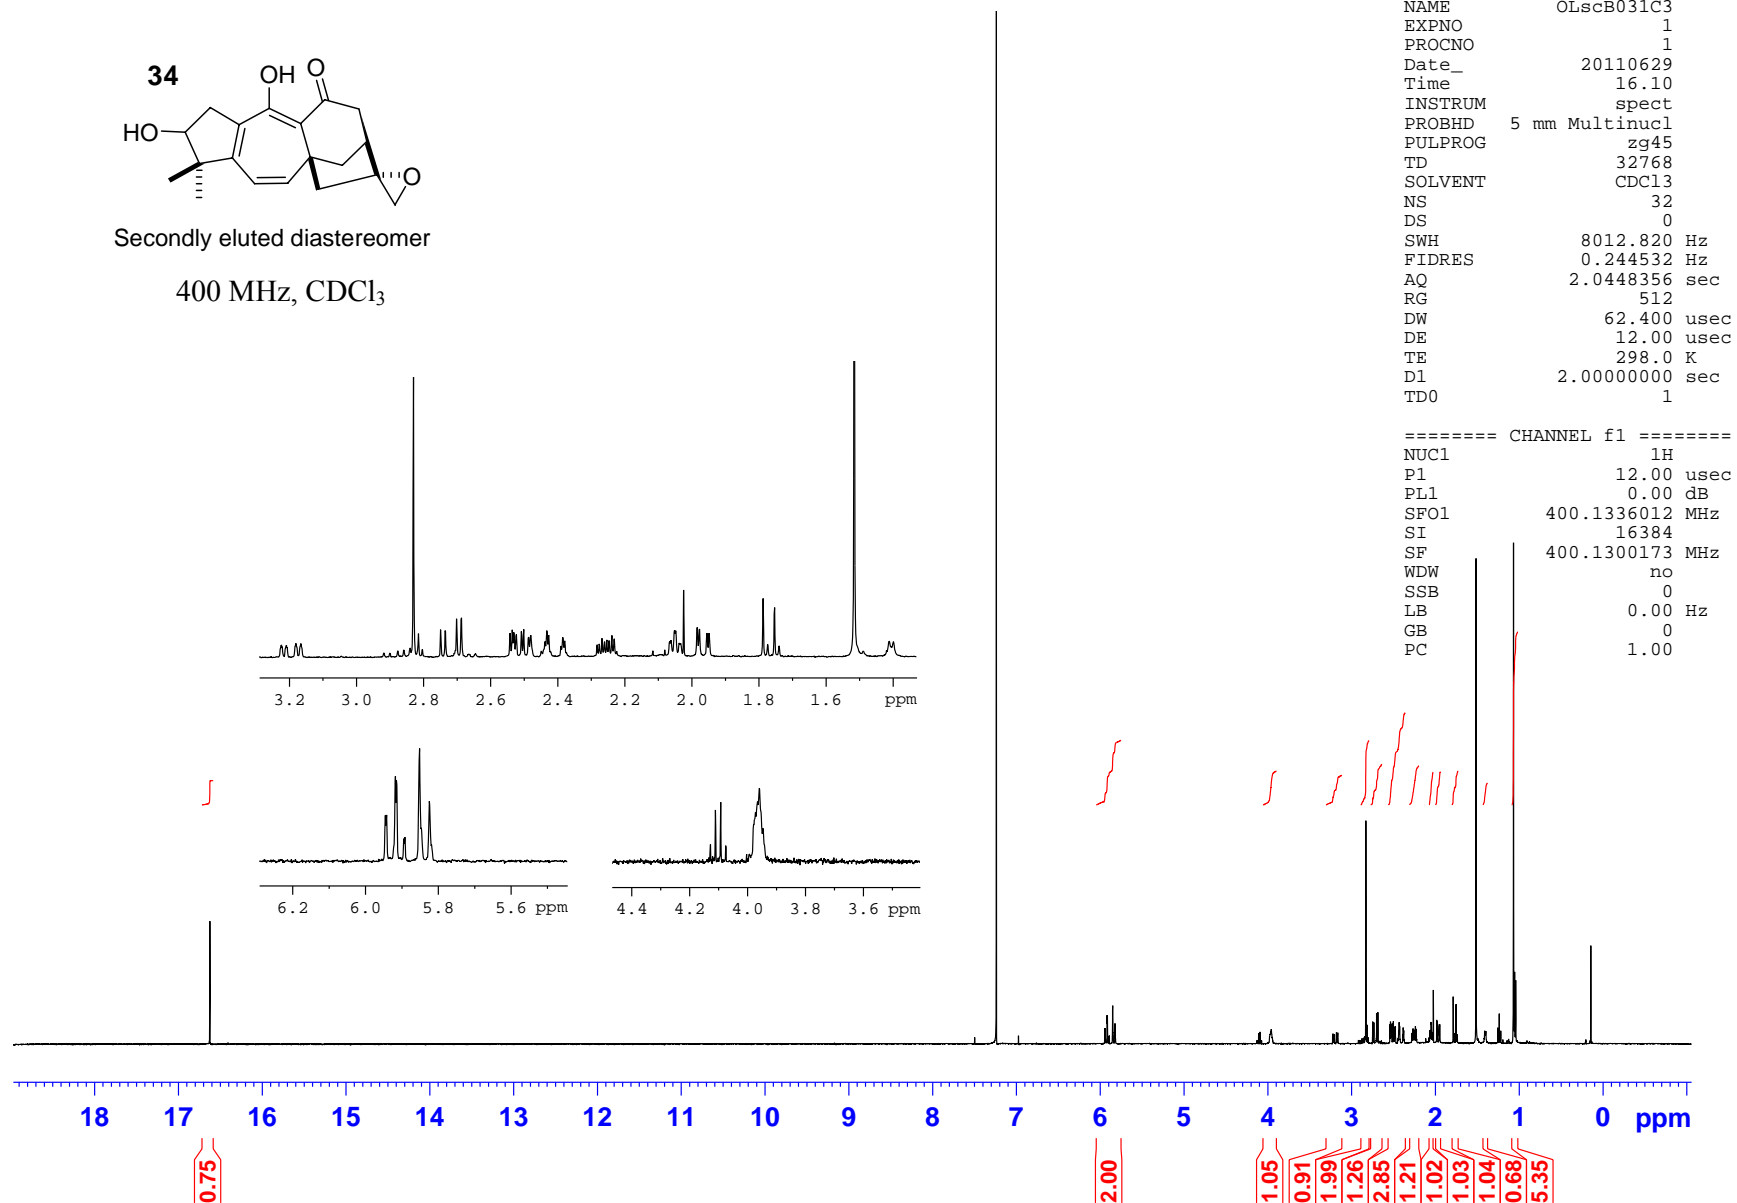

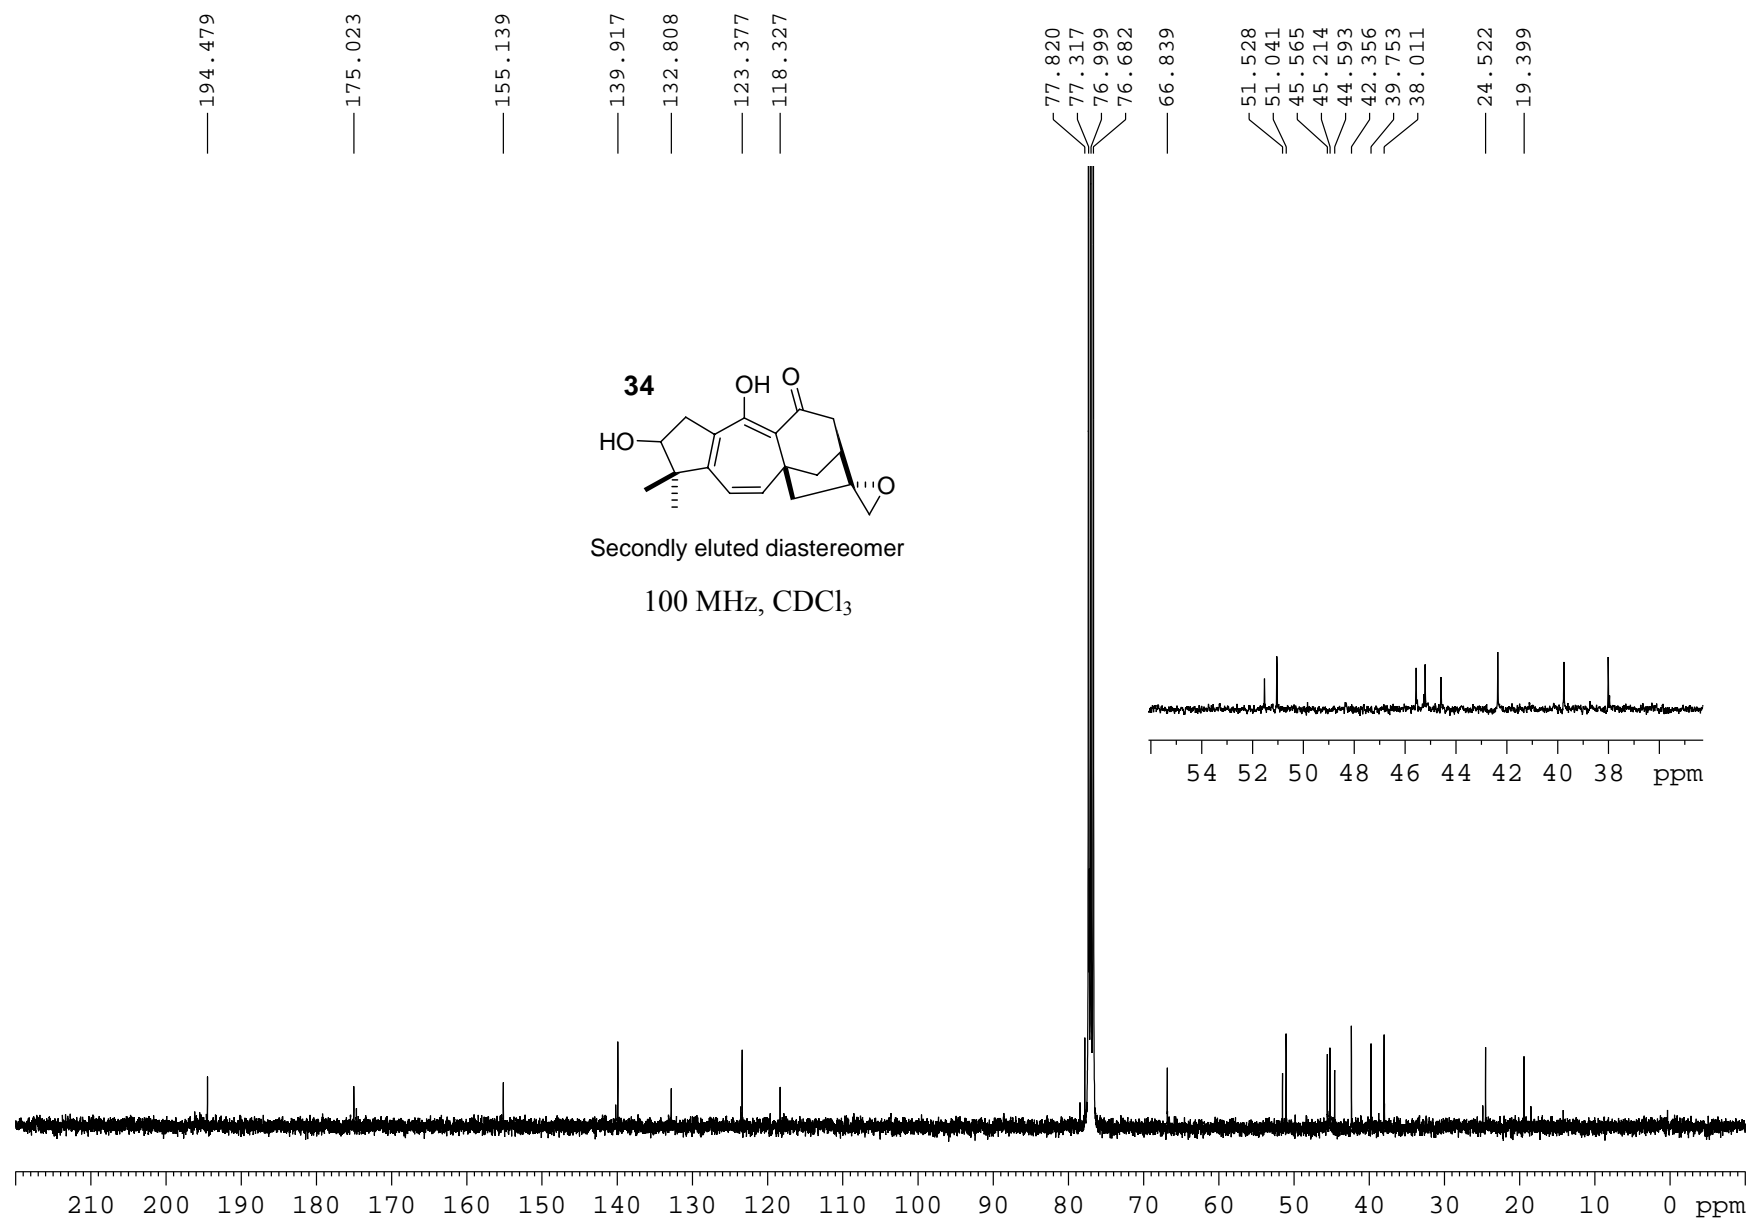

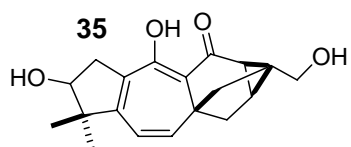

500 MHz, CDCl<sub>3</sub>

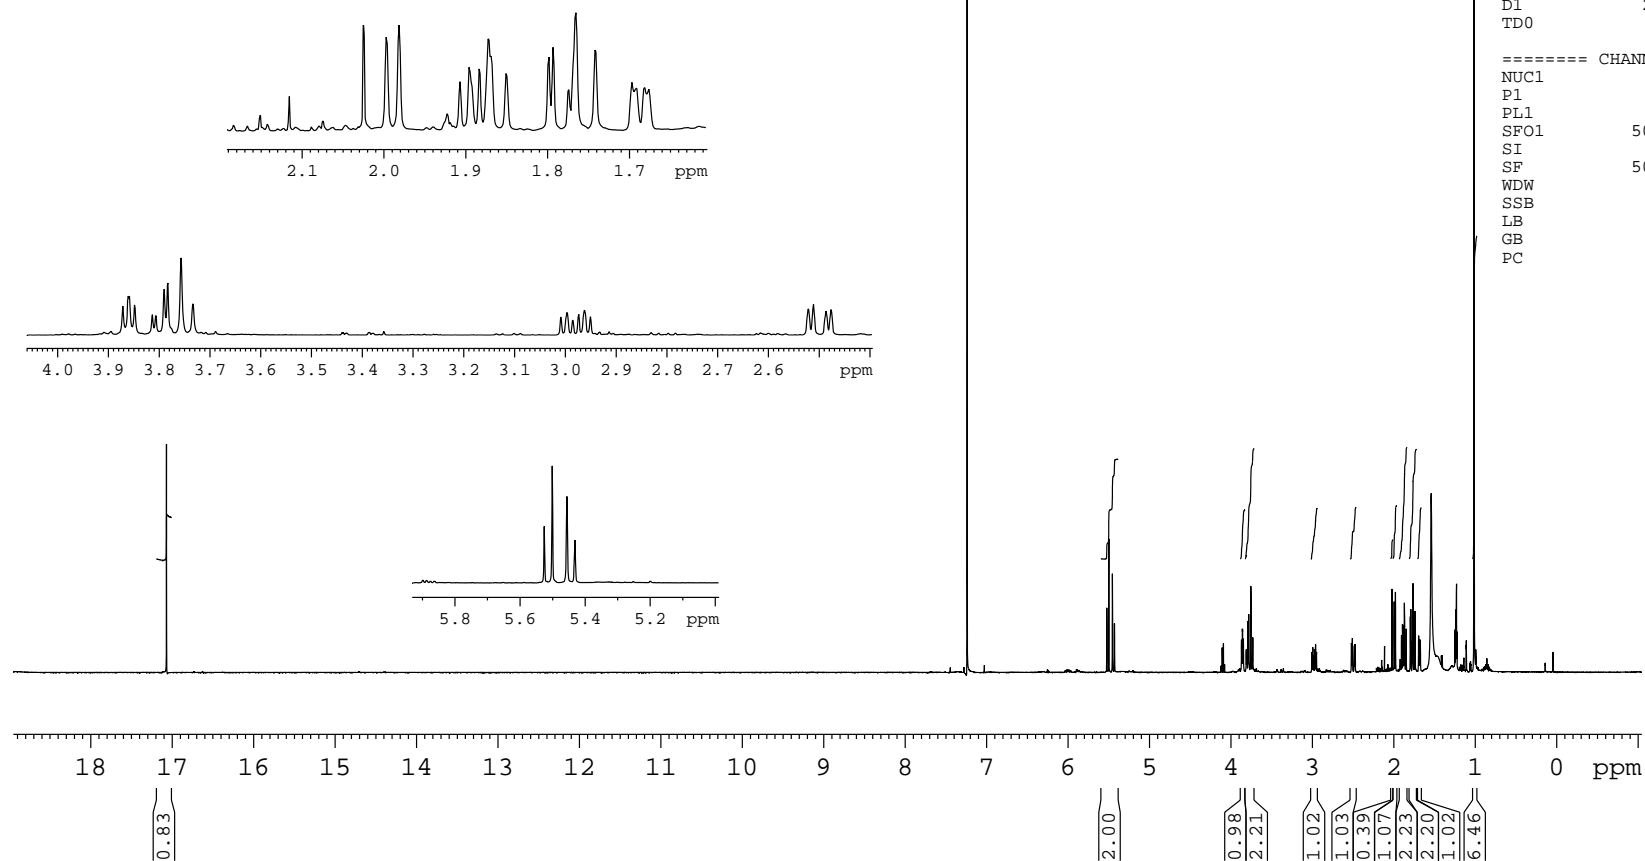

```

NAME      500scB025C4
EXPNO     2
PROCNO    1
Date_     20110617
Time      16.33
INSTRUM   spect
PROBHD    5 mm SEI 1H-13
PULPROG   zg45
TD         32768
SOLVENT   CDC13
NS         32
DS         0
SWH        10000.000 Hz
FIDRES     0.305176 Hz
AQ         1.6385000 sec
RG         256
DW         50.000 usec
DE         12.00 usec
TE         298.0 K
D1         2.00000000 sec
D10        1

===== CHANNEL f1 =====
NUC1       1H
P1         9.00 usec
PL1        -2.00 dB
SFO1       500.1345012 MHz
SI         16384
SF         500.1300236 MHz
WDW        no
SSB        0
LB         0.00 Hz
GB         0
PC         1.00

```

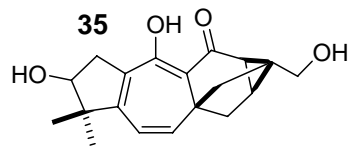

125 MHz, CDCl<sub>3</sub>

Carbon projection  
from HSQC

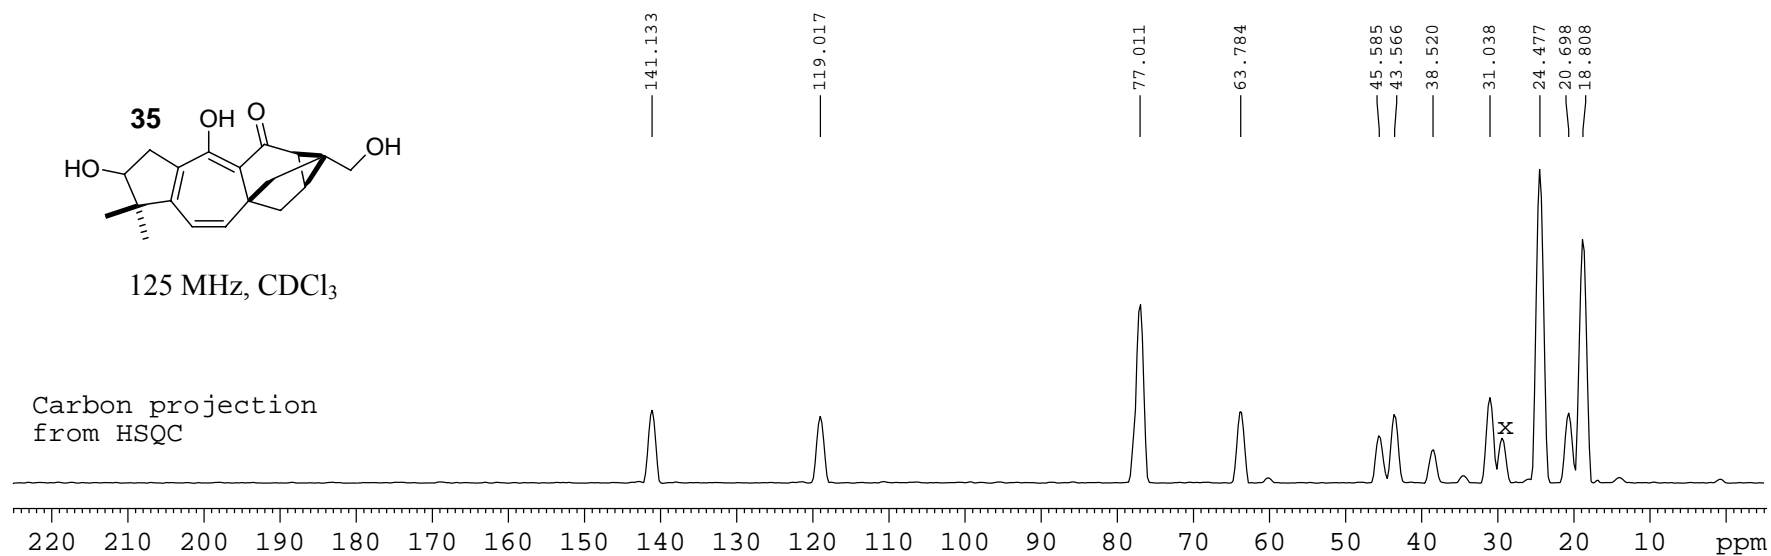

Carbon projection  
from HMBC

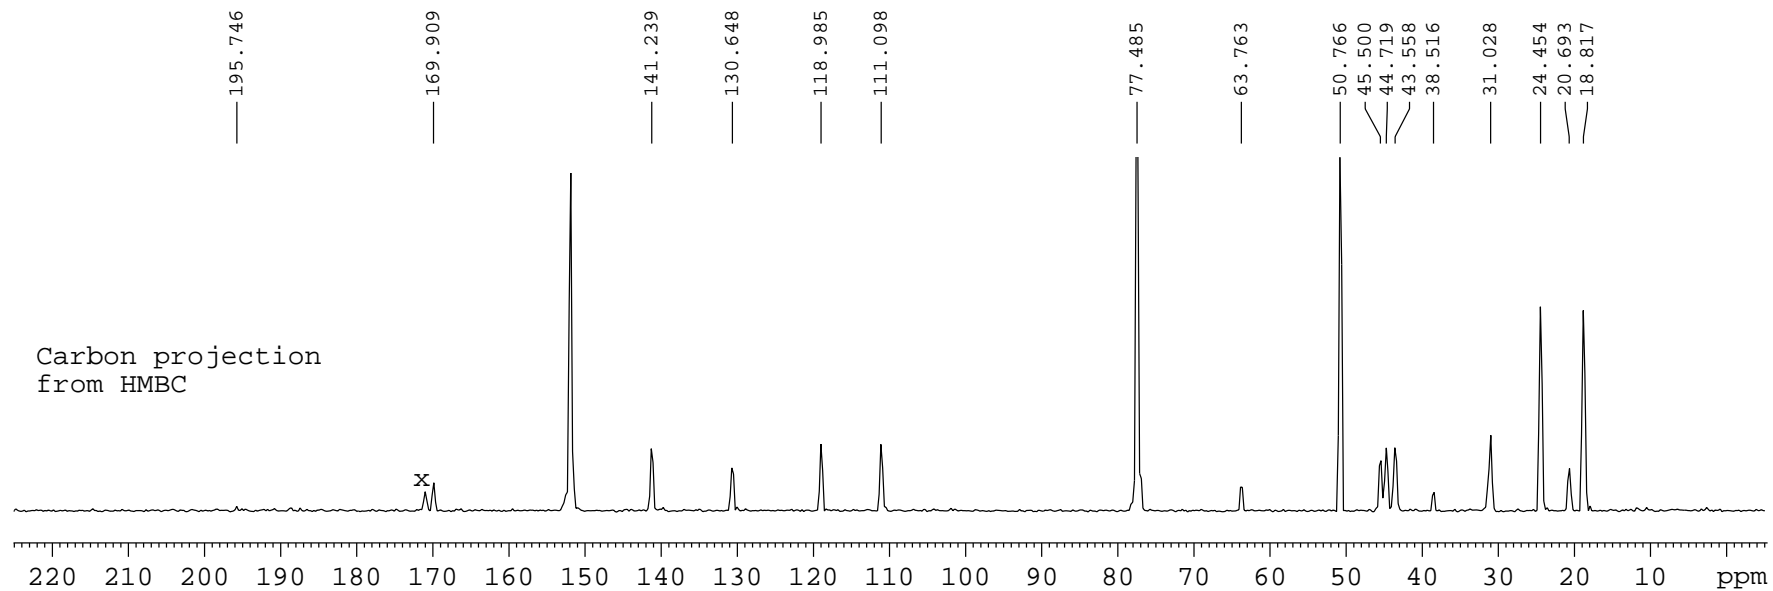

Supplement: Supplementary file 1 [file 4255252]
